# Supplementary material for: The Immune Contexture Associates with the Genomic Landscape in Lung Adenomatous Premalignancy
Source: Oxford University Press journal article supplement (doi:10.1158/0008-5472.can-19-0153), 2019-05-30
Supplement: 00085472can190153-sup-215313_2_supp_5524733_prk9pp.xlsx [file 00085472can190153-sup-215313_2_supp_5524733_prk9pp.xlsx]

## Sheet: Sheet1
Characteristic	Study Population
	(N = 41)
Age – year (mean)	66.8
Female sex – no. (%)	32 (78.0)
Ethnicity – no. (%)
Caucasian	33 (80.4)
Asian	4 (9.8)
Other	4 (9.8)
Smoking Status – no. (%)
Current	7 (17.1)
Former	28 (68.3)
Never	6 (14.6)
Pathologic Stage – no. (%)
0	3 (7.3)
1	29 (70.7)
2	9 (22.0)
