# Supplementary material for: The Immune Contexture Associates with the Genomic Landscape in Lung Adenomatous Premalignancy
Source: Oxford University Press journal article supplement (doi:10.1158/0008-5472.can-19-0153), 2019-05-30
Supplement: 00085472can190153-sup-215313_2_supp_5524735_prk9ll.xlsx [file 00085472can190153-sup-215313_2_supp_5524735_prk9ll.xlsx]

## Sheet: Sheet1
Supplementary Table S4
Database	Pathway_Name	Freq_in_UCLA	Freq_in_TCGA
REACTOME	REACTOME_AXON_GUIDANCE	0.795045	0.609756
KEGG	KEGG_FOCAL_ADHESION	0.734234	0.707317
REACTOME	REACTOME_DEVELOPMENTAL_BIOLOGY	0.711712	0.560976
KEGG	KEGG_OLFACTORY_TRANSDUCTION	0.657658	0.317073
REACTOME	REACTOME_OLFACTORY_SIGNALING_PATHWAY	0.655405	0.292683
KEGG	KEGG_CALCIUM_SIGNALING_PATHWAY	0.648649	0.439024
KEGG	KEGG_ECM_RECEPTOR_INTERACTION	0.632883	0.609756
Hallmark	HALLMARK_EPITHELIAL_MESENCHYMAL_TRANSITION	0.612613	0.439024
KEGG	KEGG_PATHWAYS_IN_CANCER	0.608108	0.341463
KEGG	KEGG_DILATED_CARDIOMYOPATHY	0.603604	0.341463
KEGG	KEGG_AXON_GUIDANCE	0.596847	0.439024
KEGG	KEGG_HYPERTROPHIC_CARDIOMYOPATHY_HCM	0.578829	0.390244
REACTOME	REACTOME_SIGNALING_BY_GPCR	0.576577	0.121951
REACTOME	REACTOME_GPCR_DOWNSTREAM_SIGNALING	0.574324	0.121951
REACTOME	REACTOME_NEURONAL_SYSTEM	0.567568	0.243902
KEGG	KEGG_GLIOMA	0.563063	0.121951
REACTOME	REACTOME_EXTRACELLULAR_MATRIX_ORGANIZATION	0.560811	0.439024
REACTOME	REACTOME_NCAM_SIGNALING_FOR_NEURITE_OUT_GROWTH	0.554054	0.414634
PID	PID_INTEGRIN1_PATHWAY	0.551802	0.560976
REACTOME	REACTOME_L1CAM_INTERACTIONS	0.545045	0.512195
KEGG	KEGG_MELANOMA	0.542793	0.0487805
KEGG	KEGG_ENDOMETRIAL_CANCER	0.540541	0.243902
KEGG	KEGG_PROSTATE_CANCER	0.540541	0.243902
KEGG	KEGG_ARRHYTHMOGENIC_RIGHT_VENTRICULAR_CARDIOMYOPATHY_ARVC	0.538288	0.317073
REACTOME	REACTOME_SIGNALING_BY_PDGF	0.531532	0.414634
REACTOME	REACTOME_HEMOSTASIS	0.531532	0.170732
Hallmark	HALLMARK_UV_RESPONSE_DN	0.527027	0.390244
KEGG	KEGG_PANCREATIC_CANCER	0.524775	0.121951
REACTOME	REACTOME_COLLAGEN_FORMATION	0.52027	0.463415
REACTOME	REACTOME_TRANSMISSION_ACROSS_CHEMICAL_SYNAPSES	0.52027	0.268293
KEGG	KEGG_TIGHT_JUNCTION	0.515766	0.317073
REACTOME	REACTOME_NEUROTRANSMITTER_RECEPTOR_BINDING_AND_DOWNSTREAM_TRANSMISSION_IN_THE_POSTSYNAPTIC_CELL	0.515766	0.195122
KEGG	KEGG_MAPK_SIGNALING_PATHWAY	0.515766	0.121951
KEGG	KEGG_REGULATION_OF_ACTIN_CYTOSKELETON	0.513514	0.414634
KEGG	KEGG_SMALL_CELL_LUNG_CANCER	0.511261	0.585366
PID	PID_AVB3_INTEGRIN_PATHWAY	0.511261	0.439024
KEGG	KEGG_NEUROACTIVE_LIGAND_RECEPTOR_INTERACTION	0.511261	0.121951
KEGG	KEGG_NON_SMALL_CELL_LUNG_CANCER	0.506757	0.243902
Hallmark	HALLMARK_MYOGENESIS	0.5	0.439024
Hallmark	HALLMARK_MITOTIC_SPINDLE	0.493243	0.634146
KEGG	KEGG_GAP_JUNCTION	0.488739	0.365854
REACTOME	REACTOME_CELL_CELL_COMMUNICATION	0.477477	0.365854
KEGG	KEGG_LONG_TERM_DEPRESSION	0.475225	0.170732
REACTOME	REACTOME_SIGNALLING_BY_NGF	0.470721	0.390244
Hallmark	HALLMARK_KRAS_SIGNALING_DN	0.470721	0.195122
Hallmark	HALLMARK_APICAL_JUNCTION	0.463964	0.487805
KEGG	KEGG_COLORECTAL_CANCER	0.463964	0.097561
KEGG	KEGG_CHRONIC_MYELOID_LEUKEMIA	0.459459	0.146341
REACTOME	REACTOME_TRANSMEMBRANE_TRANSPORT_OF_SMALL_MOLECULES	0.457207	0.390244
KEGG	KEGG_BLADDER_CANCER	0.448198	0.268293
KEGG	KEGG_LONG_TERM_POTENTIATION	0.443694	0.317073
REACTOME	REACTOME_SIGNALING_BY_RHO_GTPASES	0.439189	0.487805
PID	PID_SYNDECAN_1_PATHWAY	0.43018	0.463415
REACTOME	REACTOME_INTEGRIN_CELL_SURFACE_INTERACTIONS	0.421171	0.536585
KEGG	KEGG_GNRH_SIGNALING_PATHWAY	0.418919	0.219512
KEGG	KEGG_CELL_ADHESION_MOLECULES_CAMS	0.416667	0.317073
KEGG	KEGG_NEUROTROPHIN_SIGNALING_PATHWAY	0.416667	0.097561
REACTOME	REACTOME_O_LINKED_GLYCOSYLATION_OF_MUCINS	0.412162	0.804878
KEGG	KEGG_VIRAL_MYOCARDITIS	0.40991	0.585366
REACTOME	REACTOME_SIGNALING_BY_ERBB2	0.398649	0.268293
REACTOME	REACTOME_CELL_SURFACE_INTERACTIONS_AT_THE_VASCULAR_WALL	0.398649	0.170732
REACTOME	REACTOME_CELL_JUNCTION_ORGANIZATION	0.394144	0.195122
REACTOME	REACTOME_SIGNALING_BY_NOTCH	0.391892	0.317073
REACTOME	REACTOME_POTASSIUM_CHANNELS	0.391892	0.195122
KEGG	KEGG_ABC_TRANSPORTERS	0.38964	0.463415
KEGG	KEGG_ERBB_SIGNALING_PATHWAY	0.387387	0.243902
KEGG	KEGG_VASCULAR_SMOOTH_MUSCLE_CONTRACTION	0.380631	0.243902
REACTOME	REACTOME_NCAM1_INTERACTIONS	0.371622	0.414634
REACTOME	REACTOME_ION_CHANNEL_TRANSPORT	0.371622	0.365854
KEGG	KEGG_WNT_SIGNALING_PATHWAY	0.371622	0.146341
REACTOME	REACTOME_POST_TRANSLATIONAL_PROTEIN_MODIFICATION	0.369369	0.682927
PID	PID_P53_DOWNSTREAM_PATHWAY	0.367117	0.243902
REACTOME	REACTOME_FACTORS_INVOLVED_IN_MEGAKARYOCYTE_DEVELOPMENT_AND_PLATELET_PRODUCTION	0.367117	0.0731707
KEGG	KEGG_CARDIAC_MUSCLE_CONTRACTION	0.362613	0.0487805
PID	PID_SHP2_PATHWAY	0.358108	0.243902
REACTOME	REACTOME_GASTRIN_CREB_SIGNALLING_PATHWAY_VIA_PKC_AND_MAPK	0.353604	0.0731707
KEGG	KEGG_COMPLEMENT_AND_COAGULATION_CASCADES	0.351351	0.170732
Hallmark	HALLMARK_COMPLEMENT	0.351351	0.146341
REACTOME	REACTOME_TERMINATION_OF_O_GLYCAN_BIOSYNTHESIS	0.349099	0.95122
REACTOME	REACTOME_SIGNALING_BY_EGFR_IN_CANCER	0.349099	0.390244
REACTOME	REACTOME_PLATELET_HOMEOSTASIS	0.349099	0.170732
BIOCARTA	BIOCARTA_TEL_PATHWAY	0.346847	0.292683
REACTOME	REACTOME_SIGNALING_BY_FGFR_IN_DISEASE	0.346847	0.219512
KEGG	KEGG_INSULIN_SIGNALING_PATHWAY	0.346847	0.146341
KEGG	KEGG_THYROID_CANCER	0.346847	0.097561
REACTOME	REACTOME_DOWNSTREAM_SIGNAL_TRANSDUCTION	0.344595	0.268293
KEGG	KEGG_CELL_CYCLE	0.342342	0.317073
KEGG	KEGG_PROGESTERONE_MEDIATED_OOCYTE_MATURATION	0.342342	0.195122
PID	PID_BETA_CATENIN_NUC_PATHWAY	0.34009	0.219512
REACTOME	REACTOME_CELL_CELL_JUNCTION_ORGANIZATION	0.335586	0.0487805
REACTOME	REACTOME_SIGNALING_BY_ERBB4	0.333333	0.170732
KEGG	KEGG_MELANOGENESIS	0.333333	0.0487805
REACTOME	REACTOME_SIGNALING_BY_FGFR	0.331081	0.219512
KEGG	KEGG_BASAL_CELL_CARCINOMA	0.331081	0.097561
REACTOME	REACTOME_SLC_MEDIATED_TRANSMEMBRANE_TRANSPORT	0.326577	0.341463
REACTOME	REACTOME_DOWNSTREAM_SIGNALING_OF_ACTIVATED_FGFR	0.326577	0.146341
KEGG	KEGG_ADHERENS_JUNCTION	0.324324	0.463415
REACTOME	REACTOME_TRANSPORT_OF_INORGANIC_CATIONS_ANIONS_AND_AMINO_ACIDS_OLIGOPEPTIDES	0.324324	0.365854
KEGG	KEGG_B_CELL_RECEPTOR_SIGNALING_PATHWAY	0.324324	0.268293
REACTOME	REACTOME_NGF_SIGNALLING_VIA_TRKA_FROM_THE_PLASMA_MEMBRANE	0.324324	0.219512
KEGG	KEGG_CHEMOKINE_SIGNALING_PATHWAY	0.324324	0.146341
KEGG	KEGG_PHOSPHATIDYLINOSITOL_SIGNALING_SYSTEM	0.322072	0.317073
REACTOME	REACTOME_INSULIN_RECEPTOR_SIGNALLING_CASCADE	0.322072	0.146341
KEGG	KEGG_NATURAL_KILLER_CELL_MEDIATED_CYTOTOXICITY	0.317568	0.170732
REACTOME	REACTOME_P75_NTR_RECEPTOR_MEDIATED_SIGNALLING	0.315315	0.463415
REACTOME	REACTOME_G_ALPHA1213_SIGNALLING_EVENTS	0.315315	0.390244
PID	PID_P53_REGULATION_PATHWAY	0.315315	0.121951
REACTOME	REACTOME_CELL_DEATH_SIGNALLING_VIA_NRAGE_NRIF_AND_NADE	0.313063	0.414634
KEGG	KEGG_T_CELL_RECEPTOR_SIGNALING_PATHWAY	0.313063	0.219512
REACTOME	REACTOME_INTEGRATION_OF_ENERGY_METABOLISM	0.313063	0.195122
Hallmark	HALLMARK_G2M_CHECKPOINT	0.308559	0.292683
PID	PID_PDGFRB_PATHWAY	0.306306	0.243902
KEGG	KEGG_AMYOTROPHIC_LATERAL_SCLEROSIS_ALS	0.306306	0.0487805
REACTOME	REACTOME_ADHERENS_JUNCTIONS_INTERACTIONS	0.304054	0.219512
KEGG	KEGG_RENAL_CELL_CARCINOMA	0.304054	0.195122
REACTOME	REACTOME_PLATELET_ACTIVATION_SIGNALING_AND_AGGREGATION	0.304054	0.170732
PID	PID_LKB1_PATHWAY	0.304054	0.170732
PID	PID_INTEGRIN3_PATHWAY	0.301802	0.365854
REACTOME	REACTOME_VOLTAGE_GATED_POTASSIUM_CHANNELS	0.301802	0.195122
Hallmark	HALLMARK_WNT_BETA_CATENIN_SIGNALING	0.301802	0.146341
REACTOME	REACTOME_NRAGE_SIGNALS_DEATH_THROUGH_JNK	0.29955	0.487805
REACTOME	REACTOME_PRE_NOTCH_EXPRESSION_AND_PROCESSING	0.29955	0.317073
REACTOME	REACTOME_RESPONSE_TO_ELEVATED_PLATELET_CYTOSOLIC_CA2_	0.29955	0.317073
Hallmark	HALLMARK_KRAS_SIGNALING_UP	0.29955	0.121951
REACTOME	REACTOME_SIGNALING_BY_INSULIN_RECEPTOR	0.29955	0.0731707
PID	PID_A6B1_A6B4_INTEGRIN_PATHWAY	0.297297	0.536585
PID	PID_CMYB_PATHWAY	0.297297	0.268293
PID	PID_TRKR_PATHWAY	0.297297	0.146341
KEGG	KEGG_ENDOCYTOSIS	0.292793	0.390244
Hallmark	HALLMARK_COAGULATION	0.292793	0.170732
KEGG	KEGG_LEUKOCYTE_TRANSENDOTHELIAL_MIGRATION	0.292793	0.0731707
KEGG	KEGG_ACUTE_MYELOID_LEUKEMIA	0.288288	0.121951
Hallmark	HALLMARK_E2F_TARGETS	0.286036	0.243902
PID	PID_TCR_PATHWAY	0.286036	0.195122
REACTOME	REACTOME_GABA_RECEPTOR_ACTIVATION	0.286036	0.121951
PID	PID_MTOR_4PATHWAY	0.283784	0.195122
REACTOME	REACTOME_METABOLISM_OF_CARBOHYDRATES	0.283784	0.146341
PID	PID_REG_GR_PATHWAY	0.283784	0.146341
REACTOME	REACTOME_CELL_CYCLE	0.281532	0.317073
KEGG	KEGG_UBIQUITIN_MEDIATED_PROTEOLYSIS	0.281532	0.292683
REACTOME	REACTOME_INTERACTION_BETWEEN_L1_AND_ANKYRINS	0.279279	0.365854
KEGG	KEGG_STARCH_AND_SUCROSE_METABOLISM	0.279279	0.170732
Hallmark	HALLMARK_SPERMATOGENESIS	0.277027	0.219512
PID	PID_RHOA_REG_PATHWAY	0.274775	0.512195
REACTOME	REACTOME_ABC_FAMILY_PROTEINS_MEDIATED_TRANSPORT	0.272523	0.439024
REACTOME	REACTOME_SEMAPHORIN_INTERACTIONS	0.272523	0.414634
KEGG	KEGG_TYPE_II_DIABETES_MELLITUS	0.272523	0.317073
PID	PID_ENDOTHELIN_PATHWAY	0.27027	0.243902
PID	PID_CXCR4_PATHWAY	0.268018	0.292683
PID	PID_MYC_ACTIV_PATHWAY	0.268018	0.243902
REACTOME	REACTOME_SIGNALING_BY_ILS	0.268018	0.170732
REACTOME	REACTOME_PRE_NOTCH_TRANSCRIPTION_AND_TRANSLATION	0.265766	0.292683
PID	PID_BARD1_PATHWAY	0.261261	0.268293
REACTOME	REACTOME_GENERIC_TRANSCRIPTION_PATHWAY	0.259009	0.390244
REACTOME	REACTOME_ACTIVATION_OF_NMDA_RECEPTOR_UPON_GLUTAMATE_BINDING_AND_POSTSYNAPTIC_EVENTS	0.259009	0.317073
REACTOME	REACTOME_CYTOKINE_SIGNALING_IN_IMMUNE_SYSTEM	0.259009	0.243902
REACTOME	REACTOME_GLYCOSAMINOGLYCAN_METABOLISM	0.259009	0.097561
PID	PID_RAC1_REG_PATHWAY	0.256757	0.365854
PID	PID_NOTCH_PATHWAY	0.256757	0.292683
REACTOME	REACTOME_CELL_CYCLE_CHECKPOINTS	0.254505	0.219512
REACTOME	REACTOME_MUSCLE_CONTRACTION	0.254505	0.170732
PID	PID_AP1_PATHWAY	0.254505	0.146341
KEGG	KEGG_P53_SIGNALING_PATHWAY	0.254505	0.097561
KEGG	KEGG_APOPTOSIS	0.254505	0.0731707
PID	PID_P75_NTR_PATHWAY	0.254505	0.0487805
REACTOME	REACTOME_NETRIN1_SIGNALING	0.252252	0.365854
PID	PID_INTEGRIN_CS_PATHWAY	0.252252	0.317073
REACTOME	REACTOME_MEIOSIS	0.25	0.146341
KEGG	KEGG_FC_EPSILON_RI_SIGNALING_PATHWAY	0.25	0.097561
REACTOME	REACTOME_G_ALPHA_Q_SIGNALLING_EVENTS	0.247748	0.0731707
KEGG	KEGG_DORSO_VENTRAL_AXIS_FORMATION	0.245495	0.292683
PID	PID_ERBB1_DOWNSTREAM_PATHWAY	0.245495	0.195122
KEGG	KEGG_VEGF_SIGNALING_PATHWAY	0.243243	0.121951
REACTOME	REACTOME_SIGNALING_BY_SCF_KIT	0.243243	0.0487805
PID	PID_LYSOPHOSPHOLIPID_PATHWAY	0.240991	0.268293
REACTOME	REACTOME_RECRUITMENT_OF_MITOTIC_CENTROSOME_PROTEINS_AND_COMPLEXES	0.238739	0.390244
PID	PID_AMB2_NEUTROPHILS_PATHWAY	0.236486	0.292683
PID	PID_UPA_UPAR_PATHWAY	0.236486	0.195122
KEGG	KEGG_FC_GAMMA_R_MEDIATED_PHAGOCYTOSIS	0.234234	0.268293
BIOCARTA	BIOCARTA_CTCF_PATHWAY	0.234234	0.097561
REACTOME	REACTOME_APOPTOSIS	0.234234	0.097561
BIOCARTA	BIOCARTA_AGR_PATHWAY	0.231982	0.341463
PID	PID_ARF6_TRAFFICKING_PATHWAY	0.231982	0.317073
REACTOME	REACTOME_G_ALPHA_S_SIGNALLING_EVENTS	0.231982	0.0243902
REACTOME	REACTOME_BIOLOGICAL_OXIDATIONS	0.22973	0.195122
PID	PID_PI3KCI_PATHWAY	0.22973	0.146341
REACTOME	REACTOME_REGULATION_OF_INSULIN_SECRETION	0.22973	0.0731707
Hallmark	HALLMARK_IL2_STAT5_SIGNALING	0.227477	0.243902
REACTOME	REACTOME_MITOTIC_G2_G2_M_PHASES	0.225225	0.414634
BIOCARTA	BIOCARTA_G2_PATHWAY	0.225225	0.243902
KEGG	KEGG_PURINE_METABOLISM	0.225225	0.195122
PID	PID_CD8_TCR_PATHWAY	0.225225	0.146341
KEGG	KEGG_HUNTINGTONS_DISEASE	0.225225	0.097561
PID	PID_CDC42_PATHWAY	0.220721	0.268293
BIOCARTA	BIOCARTA_ATRBRCA_PATHWAY	0.220721	0.243902
BIOCARTA	BIOCARTA_G1_PATHWAY	0.220721	0.170732
KEGG	KEGG_INOSITOL_PHOSPHATE_METABOLISM	0.218468	0.317073
KEGG	KEGG_ALDOSTERONE_REGULATED_SODIUM_REABSORPTION	0.218468	0.146341
REACTOME	REACTOME_OPIOID_SIGNALLING	0.216216	0.097561
REACTOME	REACTOME_LOSS_OF_NLP_FROM_MITOTIC_CENTROSOMES	0.213964	0.390244
PID	PID_VEGFR1_2_PATHWAY	0.213964	0.390244
Hallmark	HALLMARK_HEDGEHOG_SIGNALING	0.213964	0.317073
REACTOME	REACTOME_PLC_BETA_MEDIATED_EVENTS	0.213964	0.292683
PID	PID_AR_PATHWAY	0.213964	0.268293
REACTOME	REACTOME_ADAPTIVE_IMMUNE_SYSTEM	0.213964	0.219512
KEGG	KEGG_ADIPOCYTOKINE_SIGNALING_PATHWAY	0.211712	0.195122
BIOCARTA	BIOCARTA_NO1_PATHWAY	0.211712	0.195122
Hallmark	HALLMARK_PI3K_AKT_MTOR_SIGNALING	0.211712	0.121951
PID	PID_ERA_GENOMIC_PATHWAY	0.209459	0.341463
REACTOME	REACTOME_POST_NMDA_RECEPTOR_ACTIVATION_EVENTS	0.209459	0.243902
KEGG	KEGG_OOCYTE_MEIOSIS	0.209459	0.170732
KEGG	KEGG_HEMATOPOIETIC_CELL_LINEAGE	0.207207	0.243902
Hallmark	HALLMARK_HEME_METABOLISM	0.207207	0.195122
Hallmark	HALLMARK_ALLOGRAFT_REJECTION	0.207207	0.097561
PID	PID_FANCONI_PATHWAY	0.204955	0.243902
Hallmark	HALLMARK_P53_PATHWAY	0.204955	0.0731707
PID	PID_TCPTP_PATHWAY	0.202703	0.292683
PID	PID_FAK_PATHWAY	0.202703	0.292683
REACTOME	REACTOME_IMMUNOREGULATORY_INTERACTIONS_BETWEEN_A_LYMPHOID_AND_A_NON_LYMPHOID_CELL	0.202703	0.268293
PID	PID_ERBB1_INTERNALIZATION_PATHWAY	0.202703	0.195122
BIOCARTA	BIOCARTA_ARF_PATHWAY	0.202703	0.170732
PID	PID_IL2_1PATHWAY	0.20045	0.170732
KEGG	KEGG_TASTE_TRANSDUCTION	0.20045	0.146341
PID	PID_BCR_5PATHWAY	0.20045	0.146341
REACTOME	REACTOME_TRANSPORT_OF_GLUCOSE_AND_OTHER_SUGARS_BILE_SALTS_AND_ORGANIC_ACIDS_METAL_IONS_AND_AMINE_COMPOUNDS	0.198198	0.317073
REACTOME	REACTOME_DNA_REPAIR	0.198198	0.268293
REACTOME	REACTOME_LIPID_DIGESTION_MOBILIZATION_AND_TRANSPORT	0.198198	0.219512
PID	REACTOME_LIPID_DIGESTION_MOBILIZATION_AND_TRANSPORT	0.198198	0.219512
REACTOME	REACTOME_STRIATED_MUSCLE_CONTRACTION	0.198198	0.146341
REACTOME	REACTOME_PI3K_CASCADE	0.198198	0.121951
REACTOME	REACTOME_G_ALPHA_I_SIGNALLING_EVENTS	0.198198	0.0487805
PID	PID_AJDISS_2PATHWAY	0.195946	0.463415
BIOCARTA	BIOCARTA_PPARA_PATHWAY	0.195946	0.243902
PID	PID_PTP1B_PATHWAY	0.195946	0.219512
REACTOME	REACTOME_SIGNALING_BY_THE_B_CELL_RECEPTOR_BCR	0.195946	0.121951
PID	PID_EPHB_FWD_PATHWAY	0.195946	0.121951
PID	PID_REELIN_PATHWAY	0.193694	0.292683
PID	PID_RAS_PATHWAY	0.193694	0.292683
PID	PID_EPHA_FWDPATHWAY	0.193694	0.219512
REACTOME	REACTOME_HEPARAN_SULFATE_HEPARIN_HS_GAG_METABOLISM	0.193694	0.121951
Hallmark	HALLMARK_BILE_ACID_METABOLISM	0.191441	0.268293
REACTOME	REACTOME_SIGNALING_BY_NOTCH1	0.191441	0.268293
PID	PID_TELOMERASE_PATHWAY	0.191441	0.268293
PID	PID_ER_NONGENOMIC_PATHWAY	0.191441	0.146341
REACTOME	REACTOME_DIABETES_PATHWAYS	0.191441	0.0731707
REACTOME	REACTOME_FATTY_ACID_TRIACYLGLYCEROL_AND_KETONE_BODY_METABOLISM	0.189189	0.390244
BIOCARTA	BIOCARTA_PAR1_PATHWAY	0.189189	0.292683
REACTOME	REACTOME_PHASE1_FUNCTIONALIZATION_OF_COMPOUNDS	0.189189	0.268293
PID	PID_TAP63_PATHWAY	0.189189	0.268293
PID	PID_FCER1_PATHWAY	0.189189	0.219512
Hallmark	HALLMARK_PROTEIN_SECRETION	0.189189	0.195122
Hallmark	HALLMARK_ANGIOGENESIS	0.189189	0.170732
Hallmark	HALLMARK_GLYCOLYSIS	0.189189	0.146341
REACTOME	REACTOME_METABOLISM_OF_LIPIDS_AND_LIPOPROTEINS	0.189189	0.121951
KEGG	KEGG_ALZHEIMERS_DISEASE	0.189189	0.097561
KEGG	KEGG_HEDGEHOG_SIGNALING_PATHWAY	0.189189	0.0487805
REACTOME	REACTOME_ION_TRANSPORT_BY_P_TYPE_ATPASES	0.186937	0.365854
REACTOME	REACTOME_PPARA_ACTIVATES_GENE_EXPRESSION	0.184685	0.365854
PID	PID_E2F_PATHWAY	0.184685	0.341463
PID	PID_HDAC_CLASSI_PATHWAY	0.184685	0.341463
PID	PID_ERBB2_ERBB3_PATHWAY	0.184685	0.219512
PID	PID_HDAC_CLASSIII_PATHWAY	0.184685	0.170732
REACTOME	REACTOME_PHOSPHOLIPASE_C_MEDIATED_CASCADE	0.184685	0.146341
REACTOME	REACTOME_MEIOTIC_SYNAPSIS	0.184685	0.146341
BIOCARTA	BIOCARTA_P53HYPOXIA_PATHWAY	0.184685	0.121951
PID	PID_CD8_TCR_DOWNSTREAM_PATHWAY	0.184685	0.121951
REACTOME	REACTOME_INTERFERON_SIGNALING	0.182432	0.414634
REACTOME	REACTOME_ANTIVIRAL_MECHANISM_BY_IFN_STIMULATED_GENES	0.182432	0.292683
BIOCARTA	BIOCARTA_INTRINSIC_PATHWAY	0.182432	0.219512
Hallmark	HALLMARK_ESTROGEN_RESPONSE_EARLY	0.182432	0.195122
REACTOME	REACTOME_SIGNALING_BY_FGFR_MUTANTS	0.182432	0.195122
REACTOME	REACTOME_CHROMOSOME_MAINTENANCE	0.182432	0.121951
PID	PID_TXA2PATHWAY	0.18018	0.268293
REACTOME	REACTOME_PI_METABOLISM	0.18018	0.243902
REACTOME	REACTOME_CLASS_I_MHC_MEDIATED_ANTIGEN_PROCESSING_PRESENTATION	0.18018	0.219512
BIOCARTA	BIOCARTA_ATM_PATHWAY	0.18018	0.170732
KEGG	KEGG_JAK_STAT_SIGNALING_PATHWAY	0.18018	0.0487805
REACTOME	REACTOME_COMPLEMENT_CASCADE	0.177928	0.170732
REACTOME	REACTOME_APOPTOTIC_EXECUTION_PHASE	0.177928	0.170732
PID	PID_FGF_PATHWAY	0.177928	0.170732
PID	PID_AURORA_A_PATHWAY	0.177928	0.121951
PID	PID_ECADHERIN_STABILIZATION_PATHWAY	0.175676	0.317073
REACTOME	REACTOME_PROCESSING_OF_CAPPED_INTRON_CONTAINING_PRE_MRNA	0.175676	0.195122
KEGG	KEGG_MTOR_SIGNALING_PATHWAY	0.175676	0.146341
REACTOME	REACTOME_MHC_CLASS_II_ANTIGEN_PRESENTATION	0.173423	0.390244
REACTOME	REACTOME_LIPOPROTEIN_METABOLISM	0.173423	0.243902
PID	PID_HES_HEY_PATHWAY	0.173423	0.243902
REACTOME	REACTOME_IL_2_SIGNALING	0.173423	0.121951
PID	PID_P38_ALPHA_BETA_DOWNSTREAM_PATHWAY	0.173423	0.121951
REACTOME	REACTOME_CIRCADIAN_CLOCK	0.171171	0.390244
PID	PID_ERBB1_RECEPTOR_PROXIMAL_PATHWAY	0.171171	0.268293
REACTOME	REACTOME_PI3K_EVENTS_IN_ERBB2_SIGNALING	0.171171	0.243902
PID	PID_MET_PATHWAY	0.171171	0.243902
PID	PID_ERBB4_PATHWAY	0.171171	0.219512
REACTOME	REACTOME_MITOTIC_PROMETAPHASE	0.171171	0.170732
PID	PID_ATF2_PATHWAY	0.171171	0.097561
KEGG	KEGG_NOTCH_SIGNALING_PATHWAY	0.168919	0.317073
REACTOME	REACTOME_LIGAND_GATED_ION_CHANNEL_TRANSPORT	0.168919	0.121951
Hallmark	HALLMARK_APICAL_SURFACE	0.166667	0.292683
REACTOME	REACTOME_CELL_CYCLE_MITOTIC	0.166667	0.292683
PID	PID_HIF1_TFPATHWAY	0.166667	0.268293
Hallmark	HALLMARK_INFLAMMATORY_RESPONSE	0.166667	0.121951
PID	PID_IL4_2PATHWAY	0.166667	0.0731707
REACTOME	REACTOME_AMINE_LIGAND_BINDING_RECEPTORS	0.166667	0.0487805
REACTOME	REACTOME_SIGNALING_BY_ROBO_RECEPTOR	0.164414	0.292683
REACTOME	REACTOME_APOPTOTIC_CLEAVAGE_OF_CELLULAR_PROTEINS	0.164414	0.219512
REACTOME	REACTOME_PHOSPHOLIPID_METABOLISM	0.164414	0.146341
PID	REACTOME_PHOSPHOLIPID_METABOLISM	0.164414	0.146341
REACTOME	REACTOME_IMMUNE_SYSTEM	0.164414	0.121951
PID	PID_CXCR3_PATHWAY	0.164414	0.0487805
REACTOME	REACTOME_FORMATION_OF_FIBRIN_CLOT_CLOTTING_CASCADE	0.164414	0.0243902
KEGG	KEGG_RETINOL_METABOLISM	0.162162	0.146341
BIOCARTA	BIOCARTA_EDG1_PATHWAY	0.162162	0.146341
REACTOME	REACTOME_MRNA_PROCESSING	0.162162	0.146341
REACTOME	REACTOME_ANTIGEN_PROCESSING_UBIQUITINATION_PROTEASOME_DEGRADATION	0.162162	0.146341
Hallmark	HALLMARK_INTERFERON_GAMMA_RESPONSE	0.162162	0.121951
BIOCARTA	BIOCARTA_PML_PATHWAY	0.162162	0.097561
REACTOME	REACTOME_MEIOTIC_RECOMBINATION	0.162162	0.097561
REACTOME	REACTOME_CLASS_A1_RHODOPSIN_LIKE_RECEPTORS	0.162162	0.0243902
PID	PID_SMAD2_3NUCLEAR_PATHWAY	0.15991	0.292683
KEGG	KEGG_DRUG_METABOLISM_CYTOCHROME_P450	0.15991	0.170732
PID	PID_KIT_PATHWAY	0.15991	0.146341
KEGG	KEGG_TOLL_LIKE_RECEPTOR_SIGNALING_PATHWAY	0.15991	0.0731707
PID	PID_HEDGEHOG_GLI_PATHWAY	0.157658	0.195122
KEGG	KEGG_STEROID_HORMONE_BIOSYNTHESIS	0.157658	0.146341
REACTOME	REACTOME_CHONDROITIN_SULFATE_DERMATAN_SULFATE_METABOLISM	0.157658	0.097561
KEGG	KEGG_LYSINE_DEGRADATION	0.155405	0.317073
REACTOME	REACTOME_TRANSCRIPTIONAL_REGULATION_OF_WHITE_ADIPOCYTE_DIFFERENTIATION	0.155405	0.170732
KEGG	KEGG_PRION_DISEASES	0.155405	0.146341
REACTOME	REACTOME_PHASE_II_CONJUGATION	0.155405	0.097561
REACTOME	REACTOME_G_ALPHA_Z_SIGNALLING_EVENTS	0.155405	0.0731707
REACTOME	REACTOME_GLUCOSE_TRANSPORT	0.153153	0.268293
REACTOME	REACTOME_DAG_AND_IP3_SIGNALING	0.153153	0.243902
KEGG	KEGG_DRUG_METABOLISM_OTHER_ENZYMES	0.153153	0.195122
PID	PID_GMCSF_PATHWAY	0.153153	0.195122
KEGG	KEGG_TGF_BETA_SIGNALING_PATHWAY	0.153153	0.170732
Hallmark	HALLMARK_HYPOXIA	0.153153	0.146341
BIOCARTA	BIOCARTA_CHEMICAL_PATHWAY	0.153153	0.121951
REACTOME	REACTOME_DOWNSTREAM_SIGNALING_EVENTS_OF_B_CELL_RECEPTOR_BCR	0.153153	0.121951
REACTOME	REACTOME_INNATE_IMMUNE_SYSTEM	0.153153	0.0731707
PID	PID_CDC42_REG_PATHWAY	0.150901	0.390244
PID	PID_HNF3A_PATHWAY	0.150901	0.268293
KEGG	KEGG_CYTOKINE_CYTOKINE_RECEPTOR_INTERACTION	0.150901	0.0487805
BIOCARTA	BIOCARTA_MYOSIN_PATHWAY	0.148649	0.292683
REACTOME	REACTOME_MITOTIC_M_M_G1_PHASES	0.148649	0.195122
KEGG	KEGG_GLYCOLYSIS_GLUCONEOGENESIS	0.148649	0.146341
REACTOME	REACTOME_GPCR_LIGAND_BINDING	0.148649	0
KEGG	KEGG_LEISHMANIA_INFECTION	0.146396	0.268293
REACTOME	REACTOME_TRANSPORT_OF_MATURE_TRANSCRIPT_TO_CYTOPLASM	0.146396	0.243902
REACTOME	REACTOME_CREB_PHOSPHORYLATION_THROUGH_THE_ACTIVATION_OF_RAS	0.146396	0.219512
Hallmark	HALLMARK_IL6_JAK_STAT3_SIGNALING	0.146396	0.146341
Hallmark	HALLMARK_APOPTOSIS	0.146396	0.0731707
REACTOME	REACTOME_TOLL_RECEPTOR_CASCADES	0.146396	0.0731707
PID	PID_NETRIN_PATHWAY	0.144144	0.317073
PID	PID_LYMPH_ANGIOGENESIS_PATHWAY	0.144144	0.195122
KEGG	KEGG_PATHOGENIC_ESCHERICHIA_COLI_INFECTION	0.144144	0.170732
PID	PID_PS1_PATHWAY	0.144144	0.170732
REACTOME	REACTOME_PI_3K_CASCADE	0.144144	0.0487805
REACTOME	REACTOME_INTERFERON_GAMMA_SIGNALING	0.141892	0.317073
PID	PID_DELTA_NP63_PATHWAY	0.141892	0.268293
REACTOME	REACTOME_NITRIC_OXIDE_STIMULATES_GUANYLATE_CYCLASE	0.141892	0.219512
PID	PID_RB_1PATHWAY	0.141892	0.195122
REACTOME	REACTOME_NEUROTRANSMITTER_RELEASE_CYCLE	0.141892	0.146341
BIOCARTA	BIOCARTA_AMI_PATHWAY	0.141892	0.121951
REACTOME	REACTOME_P53_DEPENDENT_G1_DNA_DAMAGE_RESPONSE	0.141892	0.121951
BIOCARTA	BIOCARTA_P53_PATHWAY	0.141892	0.0731707
KEGG	KEGG_PPAR_SIGNALING_PATHWAY	0.13964	0.243902
PID	PID_ATR_PATHWAY	0.13964	0.170732
PID	PID_EPHRINB_REV_PATHWAY	0.13964	0.170732
BIOCARTA	BIOCARTA_TID_PATHWAY	0.13964	0.121951
REACTOME	REACTOME_UNBLOCKING_OF_NMDA_RECEPTOR_GLUTAMATE_BINDING_AND_ACTIVATION	0.137387	0.317073
REACTOME	REACTOME_CLASS_C_3_METABOTROPIC_GLUTAMATE_PHEROMONE_RECEPTORS	0.137387	0.243902
REACTOME	REACTOME_SIGNAL_TRANSDUCTION_BY_L1	0.137387	0.243902
PID	PID_THROMBIN_PAR1_PATHWAY	0.137387	0.243902
REACTOME	REACTOME_AMINO_ACID_AND_OLIGOPEPTIDE_SLC_TRANSPORTERS	0.137387	0.170732
REACTOME	REACTOME_METABOLISM_OF_STEROID_HORMONES_AND_VITAMINS_A_AND_D	0.137387	0.121951
PID	PID_P73PATHWAY	0.137387	0.121951
REACTOME	REACTOME_MEMBRANE_TRAFFICKING	0.137387	0.097561
Hallmark	HALLMARK_ESTROGEN_RESPONSE_LATE	0.137387	0.0731707
BIOCARTA	BIOCARTA_MAPK_PATHWAY	0.135135	0.219512
REACTOME	REACTOME_CYTOCHROME_P450_ARRANGED_BY_SUBSTRATE_TYPE	0.135135	0.219512
Hallmark	HALLMARK_PEROXISOME	0.135135	0.146341
BIOCARTA	BIOCARTA_RB_PATHWAY	0.135135	0.146341
REACTOME	REACTOME_GPVI_MEDIATED_ACTIVATION_CASCADE	0.135135	0.121951
REACTOME	REACTOME_ASPARAGINE_N_LINKED_GLYCOSYLATION	0.135135	0.0731707
PID	PID_ECADHERIN_NASCENT_AJ_PATHWAY	0.132883	0.365854
BIOCARTA	BIOCARTA_PLATELETAPP_PATHWAY	0.132883	0.292683
REACTOME	REACTOME_DNA_REPLICATION	0.132883	0.195122
KEGG	KEGG_METABOLISM_OF_XENOBIOTICS_BY_CYTOCHROME_P450	0.132883	0.097561
REACTOME	REACTOME_BMAL1_CLOCK_NPAS2_ACTIVATES_CIRCADIAN_EXPRESSION	0.130631	0.414634
REACTOME	REACTOME_EFFECTS_OF_PIP2_HYDROLYSIS	0.130631	0.292683
BIOCARTA	BIOCARTA_EGF_PATHWAY	0.130631	0.268293
PID	PID_PLK1_PATHWAY	0.130631	0.243902
REACTOME	REACTOME_TRANSPORT_OF_MATURE_MRNA_DERIVED_FROM_AN_INTRONLESS_TRANSCRIPT	0.130631	0.195122
BIOCARTA	BIOCARTA_RAC1_PATHWAY	0.130631	0.170732
BIOCARTA	BIOCARTA_HIVNEF_PATHWAY	0.130631	0.146341
BIOCARTA	BIOCARTA_KERATINOCYTE_PATHWAY	0.130631	0.146341
REACTOME	REACTOME_CA_DEPENDENT_EVENTS	0.130631	0.121951
REACTOME	REACTOME_STEROID_HORMONES	0.130631	0.121951
KEGG	KEGG_NOD_LIKE_RECEPTOR_SIGNALING_PATHWAY	0.130631	0.0731707
REACTOME	REACTOME_HIV_LIFE_CYCLE	0.130631	0.0731707
PID	PID_INTEGRIN4_PATHWAY	0.128378	0.365854
REACTOME	REACTOME_AMINE_COMPOUND_SLC_TRANSPORTERS	0.128378	0.317073
PID	PID_INTEGRIN_A4B1_PATHWAY	0.128378	0.268293
BIOCARTA	BIOCARTA_PDGF_PATHWAY	0.128378	0.243902
KEGG	KEGG_SYSTEMIC_LUPUS_ERYTHEMATOSUS	0.128378	0.170732
Hallmark	HALLMARK_INTERFERON_ALPHA_RESPONSE	0.128378	0.121951
REACTOME	REACTOME_AUTODEGRADATION_OF_THE_E3_UBIQUITIN_LIGASE_COP1	0.128378	0.121951
REACTOME	REACTOME_GABA_B_RECEPTOR_ACTIVATION	0.128378	0.097561
PID	PID_PI3K_PLC_TRK_PATHWAY	0.128378	0.097561
REACTOME	REACTOME_NUCLEAR_SIGNALING_BY_ERBB4	0.128378	0.0731707
BIOCARTA	BIOCARTA_CARM_ER_PATHWAY	0.126126	0.317073
PID	PID_GLYPICAN_1PATHWAY	0.126126	0.292683
PID	PID_NCADHERIN_PATHWAY	0.126126	0.268293
BIOCARTA	BIOCARTA_MET_PATHWAY	0.126126	0.195122
REACTOME	REACTOME_GAB1_SIGNALOSOME	0.126126	0.170732
Hallmark	HALLMARK_XENOBIOTIC_METABOLISM	0.126126	0.146341
REACTOME	REACTOME_GLUCOSE_METABOLISM	0.126126	0.146341
PID	PID_IL6_7_PATHWAY	0.126126	0.146341
REACTOME	REACTOME_METABOLISM_OF_NON_CODING_RNA	0.126126	0.097561
REACTOME	REACTOME_ACTIVATED_TLR4_SIGNALLING	0.126126	0.097561
REACTOME	REACTOME_CLASS_B_2_SECRETIN_FAMILY_RECEPTORS	0.126126	0
REACTOME	REACTOME_PLATELET_CALCIUM_HOMEOSTASIS	0.123874	0.317073
PID	PID_RHOA_PATHWAY	0.123874	0.292683
KEGG	KEGG_GLYCEROLIPID_METABOLISM	0.123874	0.219512
PID	KEGG_GLYCEROLIPID_METABOLISM	0.123874	0.219512
PID	PID_AR_TF_PATHWAY	0.123874	0.195122
PID	PID_SYNDECAN_2_PATHWAY	0.123874	0.170732
REACTOME	REACTOME_LATE_PHASE_OF_HIV_LIFE_CYCLE	0.123874	0.0731707
PID	PID_ILK_PATHWAY	0.121622	0.268293
PID	PID_IL8_CXCR2_PATHWAY	0.121622	0.219512
PID	PID_MYC_REPRESS_PATHWAY	0.121622	0.219512
REACTOME	REACTOME_MRNA_SPLICING	0.121622	0.195122
REACTOME	REACTOME_TCR_SIGNALING	0.121622	0.170732
REACTOME	REACTOME_SIGNALLING_TO_ERKS	0.121622	0.121951
KEGG	KEGG_TYROSINE_METABOLISM	0.121622	0.0731707
BIOCARTA	BIOCARTA_FCER1_PATHWAY	0.119369	0.219512
KEGG	KEGG_VIBRIO_CHOLERAE_INFECTION	0.119369	0.195122
REACTOME	REACTOME_NUCLEAR_RECEPTOR_TRANSCRIPTION_PATHWAY	0.119369	0.170732
REACTOME	REACTOME_IL_3_5_AND_GM_CSF_SIGNALING	0.119369	0.170732
PID	PID_INTEGRIN2_PATHWAY	0.119369	0.121951
Hallmark	HALLMARK_UV_RESPONSE_UP	0.119369	0.0731707
REACTOME	REACTOME_REGULATION_OF_INSULIN_SECRETION_BY_GLUCAGON_LIKE_PEPTIDE1	0.119369	0.0731707
REACTOME	REACTOME_DEGRADATION_OF_THE_EXTRACELLULAR_MATRIX	0.119369	0.0487805
PID	PID_ATM_PATHWAY	0.117117	0.341463
Hallmark	HALLMARK_TGF_BETA_SIGNALING	0.117117	0.243902
PID	PID_IFNG_PATHWAY	0.117117	0.243902
PID	PID_FOXM1_PATHWAY	0.117117	0.195122
REACTOME	REACTOME_A_TETRASACCHARIDE_LINKER_SEQUENCE_IS_REQUIRED_FOR_GAG_SYNTHESIS	0.117117	0.146341
Hallmark	HALLMARK_DNA_REPAIR	0.117117	0.121951
REACTOME	REACTOME_AQUAPORIN_MEDIATED_TRANSPORT	0.117117	0.097561
KEGG	KEGG_EPITHELIAL_CELL_SIGNALING_IN_HELICOBACTER_PYLORI_INFECTION	0.117117	0.0731707
PID	PID_ANGIOPOIETIN_RECEPTOR_PATHWAY	0.117117	0.0731707
REACTOME	REACTOME_HS_GAG_BIOSYNTHESIS	0.117117	0.0487805
REACTOME	REACTOME_FRS2_MEDIATED_CASCADE	0.117117	0.0243902
REACTOME	REACTOME_SYNTHESIS_OF_PIPS_AT_THE_PLASMA_MEMBRANE	0.114865	0.219512
REACTOME	REACTOME_NUCLEOTIDE_BINDING_DOMAIN_LEUCINE_RICH_REPEAT_CONTAINING_RECEPTOR_NLR_SIGNALING_PATHWAYS	0.114865	0.195122
PID	PID_NFAT_3PATHWAY	0.114865	0.170732
REACTOME	REACTOME_REGULATION_OF_INSULIN_LIKE_GROWTH_FACTOR_IGF_ACTIVITY_BY_INSULIN_LIKE_GROWTH_FACTOR_BINDING_PROTEINS_IGFBPS	0.114865	0.146341
REACTOME	REACTOME_HOST_INTERACTIONS_OF_HIV_FACTORS	0.114865	0.097561
REACTOME	REACTOME_NOTCH1_INTRACELLULAR_DOMAIN_REGULATES_TRANSCRIPTION	0.112613	0.195122
REACTOME	REACTOME_GRB2_EVENTS_IN_ERBB2_SIGNALING	0.112613	0.146341
REACTOME	REACTOME_PI3K_EVENTS_IN_ERBB4_SIGNALING	0.112613	0.146341
REACTOME	REACTOME_PI3K_AKT_ACTIVATION	0.112613	0.146341
REACTOME	REACTOME_GABA_A_RECEPTOR_ACTIVATION	0.112613	0.121951
REACTOME	REACTOME_NEP_NS2_INTERACTS_WITH_THE_CELLULAR_EXPORT_MACHINERY	0.11036	0.243902
REACTOME	REACTOME_TRANSPORT_OF_RIBONUCLEOPROTEINS_INTO_THE_HOST_NUCLEUS	0.11036	0.243902
BIOCARTA	BIOCARTA_ERK_PATHWAY	0.11036	0.219512
REACTOME	REACTOME_INTERACTIONS_OF_VPR_WITH_HOST_CELLULAR_PROTEINS	0.11036	0.219512
KEGG	KEGG_PORPHYRIN_AND_CHLOROPHYLL_METABOLISM	0.11036	0.170732
REACTOME	REACTOME_MYD88_MAL_CASCADE_INITIATED_ON_PLASMA_MEMBRANE	0.11036	0.121951
PID	PID_HNF3B_PATHWAY	0.11036	0.097561
KEGG	KEGG_BUTANOATE_METABOLISM	0.11036	0.0731707
KEGG	KEGG_PRIMARY_IMMUNODEFICIENCY	0.11036	0.0243902
REACTOME	REACTOME_METABOLISM_OF_PROTEINS	0.108108	0.536585
REACTOME	REACTOME_SEMA4D_IN_SEMAPHORIN_SIGNALING	0.108108	0.268293
REACTOME	REACTOME_REGULATION_OF_GLUCOKINASE_BY_GLUCOKINASE_REGULATORY_PROTEIN	0.108108	0.268293
BIOCARTA	BIOCARTA_INTEGRIN_PATHWAY	0.108108	0.195122
REACTOME	REACTOME_TRAFFICKING_OF_AMPA_RECEPTORS	0.108108	0.146341
PID	PID_INSULIN_PATHWAY	0.108108	0.146341
Hallmark	HALLMARK_ADIPOGENESIS	0.108108	0.121951
REACTOME	REACTOME_TRANSPORT_TO_THE_GOLGI_AND_SUBSEQUENT_MODIFICATION	0.108108	0.121951
REACTOME	REACTOME_NFKB_AND_MAP_KINASES_ACTIVATION_MEDIATED_BY_TLR4_SIGNALING_REPERTOIRE	0.108108	0.121951
REACTOME	REACTOME_COSTIMULATION_BY_THE_CD28_FAMILY	0.108108	0.0731707
PID	PID_RET_PATHWAY	0.108108	0.0731707
PID	PID_FOXO_PATHWAY	0.108108	0.0487805
Hallmark	HALLMARK_PANCREAS_BETA_CELLS	0.108108	0
REACTOME	REACTOME_DOUBLE_STRAND_BREAK_REPAIR	0.105856	0.317073
REACTOME	REACTOME_RAS_ACTIVATION_UOPN_CA2_INFUX_THROUGH_NMDA_RECEPTOR	0.105856	0.219512
BIOCARTA	BIOCARTA_LAIR_PATHWAY	0.105856	0.195122
REACTOME	REACTOME_TRANS_GOLGI_NETWORK_VESICLE_BUDDING	0.105856	0.195122
PID	PID_TGFBR_PATHWAY	0.105856	0.195122
KEGG	KEGG_ALANINE_ASPARTATE_AND_GLUTAMATE_METABOLISM	0.105856	0.121951
PID	PID_NFAT_TFPATHWAY	0.105856	0.121951
Hallmark	HALLMARK_ANDROGEN_RESPONSE	0.105856	0.0487805
REACTOME	REACTOME_REGULATION_OF_WATER_BALANCE_BY_RENAL_AQUAPORINS	0.105856	0.0487805
PID	PID_HEDGEHOG_2PATHWAY	0.103604	0.268293
PID	PID_RAC1_PATHWAY	0.103604	0.243902
REACTOME	REACTOME_SIGNALING_BY_TGF_BETA_RECEPTOR_COMPLEX	0.103604	0.219512
PID	PID_IL12_2PATHWAY	0.103604	0.195122
BIOCARTA	BIOCARTA_NFAT_PATHWAY	0.103604	0.097561
REACTOME	REACTOME_PEPTIDE_LIGAND_BINDING_RECEPTORS	0.103604	0
REACTOME	REACTOME_NEPHRIN_INTERACTIONS	0.101351	0.292683
PID	PID_ARF6_PATHWAY	0.101351	0.292683
PID	PID_SYNDECAN_4_PATHWAY	0.101351	0.292683
BIOCARTA	BIOCARTA_HER2_PATHWAY	0.101351	0.268293
PID	PID_IL8_CXCR1_PATHWAY	0.101351	0.195122
BIOCARTA	BIOCARTA_BIOPEPTIDES_PATHWAY	0.101351	0.170732
REACTOME	REACTOME_S_PHASE	0.101351	0.170732
REACTOME	REACTOME_SPHINGOLIPID_METABOLISM	0.101351	0.146341
PID	REACTOME_SPHINGOLIPID_METABOLISM	0.101351	0.146341
BIOCARTA	BIOCARTA_COMP_PATHWAY	0.101351	0.097561
PID	PID_AURORA_B_PATHWAY	0.101351	0.0731707
BIOCARTA	BIOCARTA_TCR_PATHWAY	0.0990991	0.195122
KEGG	KEGG_SPLICEOSOME	0.0990991	0.170732
REACTOME	REACTOME_CREB_PHOSPHORYLATION_THROUGH_THE_ACTIVATION_OF_CAMKII	0.0990991	0.170732
PID	PID_HIF1A_PATHWAY	0.0990991	0.097561
PID	PID_NEPHRIN_NEPH1_PATHWAY	0.0990991	0.097561
PID	PID_BMP_PATHWAY	0.0990991	0.0731707
REACTOME	REACTOME_RORA_ACTIVATES_CIRCADIAN_EXPRESSION	0.0968468	0.439024
KEGG	KEGG_ANTIGEN_PROCESSING_AND_PRESENTATION	0.0968468	0.317073
KEGG	KEGG_AUTOIMMUNE_THYROID_DISEASE	0.0968468	0.219512
REACTOME	REACTOME_METABOLISM_OF_NUCLEOTIDES	0.0968468	0.195122
REACTOME	REACTOME_SIGNALING_BY_CONSTITUTIVELY_ACTIVE_EGFR	0.0968468	0.170732
PID	PID_HDAC_CLASSII_PATHWAY	0.0968468	0.170732
BIOCARTA	BIOCARTA_IL2RB_PATHWAY	0.0968468	0.146341
REACTOME	REACTOME_PROTEIN_FOLDING	0.0968468	0.121951
PID	PID_MAPK_TRK_PATHWAY	0.0968468	0.121951
KEGG	KEGG_GLYCEROPHOSPHOLIPID_METABOLISM	0.0968468	0.097561
PID	KEGG_GLYCEROPHOSPHOLIPID_METABOLISM	0.0968468	0.097561
BIOCARTA	BIOCARTA_ALK_PATHWAY	0.0968468	0.0731707
REACTOME	REACTOME_SHC_MEDIATED_CASCADE	0.0968468	0.0243902
PID	PID_LIS1_PATHWAY	0.0945946	0.268293
BIOCARTA	BIOCARTA_RHO_PATHWAY	0.0945946	0.243902
BIOCARTA	BIOCARTA_VEGF_PATHWAY	0.0945946	0.243902
PID	PID_WNT_NONCANONICAL_PATHWAY	0.0945946	0.219512
REACTOME	REACTOME_G2_M_CHECKPOINTS	0.0945946	0.170732
PID	PID_EPO_PATHWAY	0.0945946	0.170732
KEGG	KEGG_LYSOSOME	0.0945946	0.146341
BIOCARTA	BIOCARTA_NOS1_PATHWAY	0.0945946	0.146341
BIOCARTA	BIOCARTA_TOLL_PATHWAY	0.0945946	0.146341
Hallmark	HALLMARK_MYC_TARGETS_V1	0.0945946	0.121951
REACTOME	REACTOME_MITOTIC_G1_G1_S_PHASES	0.0945946	0.121951
KEGG	KEGG_ARGININE_AND_PROLINE_METABOLISM	0.0945946	0.097561
KEGG	KEGG_ASCORBATE_AND_ALDARATE_METABOLISM	0.0945946	0.0731707
REACTOME	REACTOME_INTRINSIC_PATHWAY_FOR_APOPTOSIS	0.0945946	0.0487805
KEGG	KEGG_AMINOACYL_TRNA_BIOSYNTHESIS	0.0923423	0.341463
REACTOME	REACTOME_OTHER_SEMAPHORIN_INTERACTIONS	0.0923423	0.341463
BIOCARTA	BIOCARTA_ACE2_PATHWAY	0.0923423	0.268293
BIOCARTA	BIOCARTA_GH_PATHWAY	0.0923423	0.195122
PID	PID_AVB3_OPN_PATHWAY	0.0923423	0.195122
PID	PID_CASPASE_PATHWAY	0.0923423	0.195122
REACTOME	REACTOME_GLUCAGON_SIGNALING_IN_METABOLIC_REGULATION	0.0923423	0.121951
REACTOME	REACTOME_GOLGI_ASSOCIATED_VESICLE_BIOGENESIS	0.0923423	0.121951
Hallmark	HALLMARK_CHOLESTEROL_HOMEOSTASIS	0.0923423	0.0487805
REACTOME	REACTOME_CIRCADIAN_REPRESSION_OF_EXPRESSION_BY_REV_ERBA	0.0900901	0.390244
REACTOME	REACTOME_TRNA_AMINOACYLATION	0.0900901	0.341463
REACTOME	REACTOME_ABCA_TRANSPORTERS_IN_LIPID_HOMEOSTASIS	0.0900901	0.268293
PID	REACTOME_ABCA_TRANSPORTERS_IN_LIPID_HOMEOSTASIS	0.0900901	0.268293
REACTOME	REACTOME_ANTIGEN_ACTIVATES_B_CELL_RECEPTOR_LEADING_TO_GENERATION_OF_SECOND_MESSENGERS	0.0900901	0.243902
REACTOME	REACTOME_FANCONI_ANEMIA_PATHWAY	0.0900901	0.219512
PID	PID_IL2_PI3K_PATHWAY	0.0900901	0.170732
KEGG	KEGG_DNA_REPLICATION	0.0900901	0.146341
REACTOME	REACTOME_SYNTHESIS_OF_DNA	0.0900901	0.146341
PID	PID_FRA_PATHWAY	0.0900901	0.146341
REACTOME	REACTOME_RIG_I_MDA5_MEDIATED_INDUCTION_OF_IFN_ALPHA_BETA_PATHWAYS	0.0900901	0.097561
PID	PID_TOLL_ENDOGENOUS_PATHWAY	0.0900901	0.0731707
REACTOME	REACTOME_KINESINS	0.0878378	0.243902
REACTOME	REACTOME_G1_S_TRANSITION	0.0878378	0.146341
KEGG	KEGG_PENTOSE_AND_GLUCURONATE_INTERCONVERSIONS	0.0878378	0.121951
REACTOME	REACTOME_PKB_MEDIATED_EVENTS	0.0878378	0.121951
REACTOME	REACTOME_METABOLISM_OF_AMINO_ACIDS_AND_DERIVATIVES	0.0878378	0.0731707
REACTOME	REACTOME_CHONDROITIN_SULFATE_BIOSYNTHESIS	0.0878378	0.0487805
REACTOME	REACTOME_INWARDLY_RECTIFYING_K_CHANNELS	0.0878378	0.0487805
KEGG	KEGG_TRYPTOPHAN_METABOLISM	0.0878378	0.0243902
PID	PID_NECTIN_PATHWAY	0.0855856	0.317073
BIOCARTA	BIOCARTA_EIF4_PATHWAY	0.0855856	0.292683
PID	PID_INTEGRIN_A9B1_PATHWAY	0.0855856	0.292683
REACTOME	REACTOME_INTERFERON_ALPHA_BETA_SIGNALING	0.0855856	0.243902
KEGG	KEGG_GALACTOSE_METABOLISM	0.0855856	0.219512
KEGG	KEGG_RNA_DEGRADATION	0.0855856	0.170732
KEGG	KEGG_O_GLYCAN_BIOSYNTHESIS	0.0855856	0.121951
KEGG	KEGG_PYRUVATE_METABOLISM	0.0855856	0.121951
REACTOME	REACTOME_ACTIVATION_OF_KAINATE_RECEPTORS_UPON_GLUTAMATE_BINDING	0.0855856	0.097561
REACTOME	REACTOME_HIV_INFECTION	0.0855856	0.097561
PID	PID_FAS_PATHWAY	0.0855856	0.097561
KEGG	KEGG_GLYCOSAMINOGLYCAN_BIOSYNTHESIS_HEPARAN_SULFATE	0.0855856	0.0487805
PID	PID_BETA_CATENIN_DEG_PATHWAY	0.0833333	0.243902
REACTOME	REACTOME_PLATELET_AGGREGATION_PLUG_FORMATION	0.0833333	0.170732
PID	PID_NFKAPPAB_CANONICAL_PATHWAY	0.0833333	0.170732
PID	PID_TNF_PATHWAY	0.0833333	0.170732
PID	PID_INTEGRIN5_PATHWAY	0.0833333	0.170732
PID	PID_CERAMIDE_PATHWAY	0.0833333	0.146341
REACTOME	REACTOME_RNA_POL_II_TRANSCRIPTION	0.0833333	0.0731707
BIOCARTA	BIOCARTA_GSK3_PATHWAY	0.0833333	0.0487805
PID	PID_P38_MKK3_6PATHWAY	0.0810811	0.292683
REACTOME	REACTOME_PKA_MEDIATED_PHOSPHORYLATION_OF_CREB	0.0810811	0.243902
PID	PID_AR_NONGENOMIC_PATHWAY	0.0810811	0.195122
BIOCARTA	BIOCARTA_P38MAPK_PATHWAY	0.0810811	0.170732
REACTOME	REACTOME_ACTIVATION_OF_THE_PRE_REPLICATIVE_COMPLEX	0.0810811	0.170732
BIOCARTA	BIOCARTA_CREB_PATHWAY	0.0810811	0.146341
REACTOME	REACTOME_METABOLISM_OF_RNA	0.0810811	0.146341
REACTOME	REACTOME_CGMP_EFFECTS	0.0810811	0.146341
REACTOME	REACTOME_TRIF_MEDIATED_TLR3_SIGNALING	0.0810811	0.121951
REACTOME	REACTOME_TRAF6_MEDIATED_INDUCTION_OF_NFKB_AND_MAP_KINASES_UPON_TLR7_8_OR_9_ACTIVATION	0.0810811	0.121951
BIOCARTA	BIOCARTA_CCR3_PATHWAY	0.0810811	0.097561
REACTOME	REACTOME_TIE2_SIGNALING	0.0810811	0.097561
Hallmark	HALLMARK_FATTY_ACID_METABOLISM	0.0810811	0.0731707
BIOCARTA	BIOCARTA_SPPA_PATHWAY	0.0810811	0.0731707
REACTOME	REACTOME_CD28_CO_STIMULATION	0.0810811	0.0731707
REACTOME	REACTOME_THE_ROLE_OF_NEF_IN_HIV1_REPLICATION_AND_DISEASE_PATHOGENESIS	0.0788288	0.219512
REACTOME	REACTOME_DIGESTION_OF_DIETARY_CARBOHYDRATE	0.0788288	0.170732
PID	PID_S1P_S1P1_PATHWAY	0.0788288	0.170732
PID	PID_IGF1_PATHWAY	0.0788288	0.170732
REACTOME	REACTOME_GLYCOSPHINGOLIPID_METABOLISM	0.0788288	0.146341
PID	PID_PI3KCI_AKT_PATHWAY	0.0788288	0.146341
PID	REACTOME_GLYCOSPHINGOLIPID_METABOLISM	0.0788288	0.146341
BIOCARTA	BIOCARTA_TFF_PATHWAY	0.0788288	0.097561
REACTOME	REACTOME_TRIGLYCERIDE_BIOSYNTHESIS	0.0765766	0.243902
PID	PID_LPA4_PATHWAY	0.0765766	0.243902
BIOCARTA	BIOCARTA_IGF1_PATHWAY	0.0765766	0.219512
BIOCARTA	BIOCARTA_TPO_PATHWAY	0.0765766	0.219512
REACTOME	REACTOME_ACTIVATED_NOTCH1_TRANSMITS_SIGNAL_TO_THE_NUCLEUS	0.0765766	0.195122
BIOCARTA	BIOCARTA_TNFR1_PATHWAY	0.0765766	0.170732
PID	PID_P38_ALPHA_BETA_PATHWAY	0.0765766	0.170732
REACTOME	REACTOME_UNFOLDED_PROTEIN_RESPONSE	0.0765766	0.146341
REACTOME	REACTOME_TRANSCRIPTION	0.0765766	0.121951
REACTOME	REACTOME_TELOMERE_MAINTENANCE	0.0765766	0.121951
BIOCARTA	BIOCARTA_CLASSIC_PATHWAY	0.0765766	0.097561
REACTOME	REACTOME_GLYCEROPHOSPHOLIPID_BIOSYNTHESIS	0.0765766	0.097561
PID	PID_IL23_PATHWAY	0.0765766	0.097561
PID	REACTOME_GLYCEROPHOSPHOLIPID_BIOSYNTHESIS	0.0765766	0.097561
BIOCARTA	BIOCARTA_VITCB_PATHWAY	0.0743243	0.317073
REACTOME	REACTOME_ACTIVATION_OF_CHAPERONE_GENES_BY_XBP1S	0.0743243	0.170732
REACTOME	REACTOME_MYOGENESIS	0.0743243	0.170732
Hallmark	HALLMARK_UNFOLDED_PROTEIN_RESPONSE	0.0743243	0.146341
BIOCARTA	BIOCARTA_ECM_PATHWAY	0.0743243	0.146341
BIOCARTA	BIOCARTA_FAS_PATHWAY	0.0743243	0.146341
REACTOME	REACTOME_IL1_SIGNALING	0.0743243	0.097561
REACTOME	REACTOME_IL_RECEPTOR_SHC_SIGNALING	0.0743243	0.097561
KEGG	KEGG_ARACHIDONIC_ACID_METABOLISM	0.0743243	0.0243902
REACTOME	REACTOME_YAP1_AND_WWTR1_TAZ_STIMULATED_GENE_EXPRESSION	0.0720721	0.317073
KEGG	KEGG_GRAFT_VERSUS_HOST_DISEASE	0.0720721	0.243902
BIOCARTA	BIOCARTA_PITX2_PATHWAY	0.0720721	0.243902
PID	PID_RXR_VDR_PATHWAY	0.0720721	0.243902
PID	PID_ECADHERIN_KERATINOCYTE_PATHWAY	0.0720721	0.243902
PID	PID_RETINOIC_ACID_PATHWAY	0.0720721	0.219512
BIOCARTA	BIOCARTA_BCR_PATHWAY	0.0720721	0.195122
REACTOME	REACTOME_MAP_KINASE_ACTIVATION_IN_TLR_CASCADE	0.0720721	0.195122
PID	PID_PDGFRA_PATHWAY	0.0720721	0.170732
REACTOME	REACTOME_BILE_ACID_AND_BILE_SALT_METABOLISM	0.0720721	0.146341
REACTOME	REACTOME_PROLONGED_ERK_ACTIVATION_EVENTS	0.0720721	0.146341
PID	PID_ALPHA_SYNUCLEIN_PATHWAY	0.0720721	0.146341
KEGG	KEGG_PEROXISOME	0.0720721	0.121951
PID	PID_HIF2PATHWAY	0.0720721	0.121951
KEGG	KEGG_BETA_ALANINE_METABOLISM	0.0720721	0.097561
BIOCARTA	BIOCARTA_WNT_PATHWAY	0.0720721	0.097561
PID	PID_IL2_STAT5_PATHWAY	0.0720721	0.097561
REACTOME	REACTOME_COMMON_PATHWAY	0.0720721	0.0731707
REACTOME	REACTOME_NEGATIVE_REGULATION_OF_FGFR_SIGNALING	0.0720721	0.0487805
REACTOME	REACTOME_REGULATION_OF_BETA_CELL_DEVELOPMENT	0.0720721	0.0243902
PID	PID_S1P_S1P3_PATHWAY	0.0720721	0.0243902
REACTOME	REACTOME_RECYCLING_PATHWAY_OF_L1	0.0698198	0.317073
REACTOME	REACTOME_INTEGRIN_ALPHAIIB_BETA3_SIGNALING	0.0698198	0.292683
KEGG	KEGG_FATTY_ACID_METABOLISM	0.0698198	0.219512
REACTOME	REACTOME_CS_DS_DEGRADATION	0.0698198	0.219512
Hallmark	HALLMARK_NOTCH_SIGNALING	0.0698198	0.170732
REACTOME	REACTOME_SIGNALING_BY_FGFR1_MUTANTS	0.0698198	0.170732
REACTOME	REACTOME_M_G1_TRANSITION	0.0698198	0.170732
REACTOME	REACTOME_RNA_POL_I_RNA_POL_III_AND_MITOCHONDRIAL_TRANSCRIPTION	0.0698198	0.146341
REACTOME	REACTOME_SHC1_EVENTS_IN_ERBB4_SIGNALING	0.0698198	0.121951
KEGG	KEGG_NUCLEOTIDE_EXCISION_REPAIR	0.0698198	0.097561
KEGG	KEGG_VASOPRESSIN_REGULATED_WATER_REABSORPTION	0.0698198	0.097561
PID	PID_IL3_PATHWAY	0.0698198	0.0487805
KEGG	KEGG_MATURITY_ONSET_DIABETES_OF_THE_YOUNG	0.0698198	0.0243902
BIOCARTA	BIOCARTA_FIBRINOLYSIS_PATHWAY	0.0698198	0.0243902
REACTOME	REACTOME_HOMOLOGOUS_RECOMBINATION_REPAIR_OF_REPLICATION_INDEPENDENT_DOUBLE_STRAND_BREAKS	0.0675676	0.292683
Hallmark	HALLMARK_MYC_TARGETS_V2	0.0675676	0.243902
Hallmark	HALLMARK_MTORC1_SIGNALING	0.0675676	0.170732
BIOCARTA	BIOCARTA_CBL_PATHWAY	0.0675676	0.170732
KEGG	KEGG_PYRIMIDINE_METABOLISM	0.0675676	0.121951
BIOCARTA	BIOCARTA_AT1R_PATHWAY	0.0675676	0.121951
BIOCARTA	BIOCARTA_GPCR_PATHWAY	0.0675676	0.121951
KEGG	KEGG_VALINE_LEUCINE_AND_ISOLEUCINE_DEGRADATION	0.0675676	0.0731707
REACTOME	REACTOME_METABOLISM_OF_MRNA	0.0675676	0.0731707
REACTOME	REACTOME_SIGNALLING_TO_RAS	0.0675676	0.0243902
REACTOME	REACTOME_NOTCH_HLH_TRANSCRIPTION_PATHWAY	0.0653153	0.292683
REACTOME	REACTOME_NA_CL_DEPENDENT_NEUROTRANSMITTER_TRANSPORTERS	0.0653153	0.292683
REACTOME	REACTOME_ADENYLATE_CYCLASE_INHIBITORY_PATHWAY	0.0653153	0.268293
REACTOME	REACTOME_SEMA4D_INDUCED_CELL_MIGRATION_AND_GROWTH_CONE_COLLAPSE	0.0653153	0.268293
BIOCARTA	BIOCARTA_IL7_PATHWAY	0.0653153	0.195122
BIOCARTA	BIOCARTA_IGF1R_PATHWAY	0.0653153	0.195122
PID	PID_EPHA2_FWD_PATHWAY	0.0653153	0.195122
BIOCARTA	BIOCARTA_INSULIN_PATHWAY	0.0653153	0.170732
BIOCARTA	BIOCARTA_FMLP_PATHWAY	0.0653153	0.146341
KEGG	KEGG_N_GLYCAN_BIOSYNTHESIS	0.0653153	0.121951
REACTOME	REACTOME_EXTENSION_OF_TELOMERES	0.0653153	0.121951
REACTOME	REACTOME_REGULATION_OF_APOPTOSIS	0.0653153	0.097561
PID	PID_VEGFR1_PATHWAY	0.0653153	0.097561
BIOCARTA	BIOCARTA_CHREBP2_PATHWAY	0.0653153	0.0487805
REACTOME	REACTOME_DNA_STRAND_ELONGATION	0.0630631	0.219512
BIOCARTA	BIOCARTA_LECTIN_PATHWAY	0.0630631	0.195122
BIOCARTA	BIOCARTA_SPRY_PATHWAY	0.0630631	0.195122
REACTOME	REACTOME_TRANSCRIPTIONAL_ACTIVITY_OF_SMAD2_SMAD3_SMAD4_HETEROTRIMER	0.0630631	0.195122
REACTOME	REACTOME_GROWTH_HORMONE_RECEPTOR_SIGNALING	0.0630631	0.146341
KEGG	KEGG_PROPANOATE_METABOLISM	0.0630631	0.121951
REACTOME	REACTOME_ACTIVATION_OF_ATR_IN_RESPONSE_TO_REPLICATION_STRESS	0.0630631	0.097561
REACTOME	REACTOME_PIP3_ACTIVATES_AKT_SIGNALING	0.0630631	0.097561
PID	PID_IL27_PATHWAY	0.0630631	0.097561
KEGG	KEGG_CYTOSOLIC_DNA_SENSING_PATHWAY	0.0630631	0.0731707
REACTOME	REACTOME_NUCLEOTIDE_EXCISION_REPAIR	0.0630631	0.0487805
KEGG	KEGG_TYPE_I_DIABETES_MELLITUS	0.0608108	0.292683
REACTOME	REACTOME_CRMPS_IN_SEMA3A_SIGNALING	0.0608108	0.292683
BIOCARTA	BIOCARTA_BLYMPHOCYTE_PATHWAY	0.0608108	0.243902
REACTOME	REACTOME_ADENYLATE_CYCLASE_ACTIVATING_PATHWAY	0.0608108	0.243902
REACTOME	REACTOME_ACTIVATION_OF_RAC	0.0608108	0.243902
BIOCARTA	BIOCARTA_CARDIACEGF_PATHWAY	0.0608108	0.170732
KEGG	KEGG_FRUCTOSE_AND_MANNOSE_METABOLISM	0.0608108	0.146341
BIOCARTA	BIOCARTA_CXCR4_PATHWAY	0.0608108	0.146341
PID	PID_MYC_PATHWAY	0.0608108	0.146341
REACTOME	REACTOME_ORC1_REMOVAL_FROM_CHROMATIN	0.0608108	0.121951
REACTOME	REACTOME_ARMS_MEDIATED_ACTIVATION	0.0608108	0.121951
REACTOME	REACTOME_TRANSPORT_OF_VITAMINS_NUCLEOSIDES_AND_RELATED_MOLECULES	0.0608108	0.121951
REACTOME	REACTOME_INTRINSIC_PATHWAY	0.0608108	0.121951
PID	PID_IL1_PATHWAY	0.0608108	0.097561
BIOCARTA	BIOCARTA_BAD_PATHWAY	0.0608108	0.0731707
PID	PID_RHODOPSIN_PATHWAY	0.0608108	0.0731707
PID	PID_IL12_STAT4_PATHWAY	0.0608108	0.0731707
PID	PID_CONE_PATHWAY	0.0608108	0
BIOCARTA	BIOCARTA_TGFB_PATHWAY	0.0585586	0.219512
REACTOME	REACTOME_REGULATORY_RNA_PATHWAYS	0.0585586	0.219512
BIOCARTA	BIOCARTA_GLEEVEC_PATHWAY	0.0585586	0.170732
BIOCARTA	BIOCARTA_MCALPAIN_PATHWAY	0.0585586	0.170732
REACTOME	REACTOME_REGULATION_OF_MITOTIC_CELL_CYCLE	0.0585586	0.146341
REACTOME	REACTOME_METABOLISM_OF_VITAMINS_AND_COFACTORS	0.0585586	0.121951
REACTOME	REACTOME_TRAFFICKING_OF_GLUR2_CONTAINING_AMPA_RECEPTORS	0.0585586	0.121951
REACTOME	REACTOME_E2F_MEDIATED_REGULATION_OF_DNA_REPLICATION	0.0585586	0.121951
REACTOME	REACTOME_GLUCURONIDATION	0.0585586	0.121951
BIOCARTA	BIOCARTA_CK1_PATHWAY	0.0585586	0.097561
REACTOME	REACTOME_GLOBAL_GENOMIC_NER_GG_NER	0.0585586	0.097561
KEGG	KEGG_CYSTEINE_AND_METHIONINE_METABOLISM	0.0585586	0.0731707
Hallmark	HALLMARK_TNFA_SIGNALING_VIA_NFKB	0.0585586	0.0487805
REACTOME	REACTOME_HDL_MEDIATED_LIPID_TRANSPORT	0.0563063	0.195122
PID	REACTOME_HDL_MEDIATED_LIPID_TRANSPORT	0.0563063	0.195122
KEGG	KEGG_PROXIMAL_TUBULE_BICARBONATE_RECLAMATION	0.0563063	0.146341
KEGG	KEGG_AMINO_SUGAR_AND_NUCLEOTIDE_SUGAR_METABOLISM	0.0563063	0.121951
REACTOME	REACTOME_ACTIVATION_OF_NF_KAPPAB_IN_B_CELLS	0.0563063	0.097561
REACTOME	REACTOME_CD28_DEPENDENT_PI3K_AKT_SIGNALING	0.0563063	0.0731707
BIOCARTA	BIOCARTA_DC_PATHWAY	0.0563063	0.0487805
REACTOME	REACTOME_AMYLOIDS	0.0563063	0.0487805
REACTOME	REACTOME_G_PROTEIN_BETA_GAMMA_SIGNALLING	0.0563063	0.0243902
REACTOME	REACTOME_AMINO_ACID_TRANSPORT_ACROSS_THE_PLASMA_MEMBRANE	0.0540541	0.219512
BIOCARTA	BIOCARTA_CSK_PATHWAY	0.0540541	0.195122
PID	PID_ERBB_NETWORK_PATHWAY	0.0540541	0.195122
REACTOME	REACTOME_HS_GAG_DEGRADATION	0.0540541	0.170732
REACTOME	REACTOME_DOWNSTREAM_TCR_SIGNALING	0.0540541	0.170732
REACTOME	REACTOME_NOD1_2_SIGNALING_PATHWAY	0.0540541	0.121951
REACTOME	REACTOME_SYNTHESIS_OF_PA	0.0540541	0.097561
REACTOME	REACTOME_CHYLOMICRON_MEDIATED_LIPID_TRANSPORT	0.0540541	0.097561
PID	REACTOME_CHYLOMICRON_MEDIATED_LIPID_TRANSPORT	0.0540541	0.097561
KEGG	KEGG_NICOTINATE_AND_NICOTINAMIDE_METABOLISM	0.0540541	0.0731707
KEGG	KEGG_RIG_I_LIKE_RECEPTOR_SIGNALING_PATHWAY	0.0540541	0.0731707
PID	PID_WNT_SIGNALING_PATHWAY	0.0540541	0.0731707
KEGG	KEGG_BASAL_TRANSCRIPTION_FACTORS	0.0540541	0.0487805
REACTOME	REACTOME_GLUCONEOGENESIS	0.0540541	0.0487805
REACTOME	REACTOME_KERATAN_SULFATE_KERATIN_METABOLISM	0.0540541	0
BIOCARTA	BIOCARTA_VDR_PATHWAY	0.0518018	0.317073
REACTOME	REACTOME_ANTIGEN_PROCESSING_CROSS_PRESENTATION	0.0518018	0.268293
BIOCARTA	BIOCARTA_MTOR_PATHWAY	0.0518018	0.219512
BIOCARTA	BIOCARTA_NUCLEARRS_PATHWAY	0.0518018	0.219512
KEGG	KEGG_CITRATE_CYCLE_TCA_CYCLE	0.0518018	0.195122
KEGG	KEGG_BASE_EXCISION_REPAIR	0.0518018	0.195122
BIOCARTA	BIOCARTA_IL2_PATHWAY	0.0518018	0.195122
REACTOME	REACTOME_REGULATION_OF_COMPLEMENT_CASCADE	0.0518018	0.170732
PID	PID_ARF6_DOWNSTREAM_PATHWAY	0.0518018	0.170732
REACTOME	REACTOME_ASSOCIATION_OF_TRIC_CCT_WITH_TARGET_PROTEINS_DURING_BIOSYNTHESIS	0.0518018	0.146341
REACTOME	REACTOME_DEADENYLATION_DEPENDENT_MRNA_DECAY	0.0518018	0.121951
BIOCARTA	BIOCARTA_GCR_PATHWAY	0.0518018	0.097561
BIOCARTA	BIOCARTA_AKT_PATHWAY	0.0518018	0.0731707
REACTOME	REACTOME_PTM_GAMMA_CARBOXYLATION_HYPUSINE_FORMATION_AND_ARYLSULFATASE_ACTIVATION	0.0518018	0.0731707
PID	PID_TRAIL_PATHWAY	0.0518018	0.0731707
REACTOME	REACTOME_RNA_POL_I_TRANSCRIPTION	0.0518018	0.0487805
BIOCARTA	BIOCARTA_EXTRINSIC_PATHWAY	0.0518018	0.0243902
KEGG	KEGG_ETHER_LIPID_METABOLISM	0.0518018	0
PID	KEGG_ETHER_LIPID_METABOLISM	0.0518018	0
REACTOME	REACTOME_SIGNALING_BY_FGFR1_FUSION_MUTANTS	0.0495495	0.292683
REACTOME	REACTOME_SYNTHESIS_OF_PIPS_AT_THE_GOLGI_MEMBRANE	0.0495495	0.219512
PID	PID_ERB_GENOMIC_PATHWAY	0.0495495	0.219512
REACTOME	REACTOME_GENERATION_OF_SECOND_MESSENGER_MOLECULES	0.0495495	0.195122
KEGG	KEGG_RENIN_ANGIOTENSIN_SYSTEM	0.0495495	0.170732
REACTOME	REACTOME_SIGNALING_BY_HIPPO	0.0495495	0.170732
BIOCARTA	BIOCARTA_CELL2CELL_PATHWAY	0.0495495	0.146341
REACTOME	REACTOME_PYRUVATE_METABOLISM_AND_CITRIC_ACID_TCA_CYCLE	0.0495495	0.146341
REACTOME	REACTOME_REGULATION_OF_MRNA_STABILITY_BY_PROTEINS_THAT_BIND_AU_RICH_ELEMENTS	0.0495495	0.146341
REACTOME	REACTOME_APC_C_CDC20_MEDIATED_DEGRADATION_OF_MITOTIC_PROTEINS	0.0495495	0.146341
REACTOME	REACTOME_INFLUENZA_LIFE_CYCLE	0.0495495	0.0731707
REACTOME	REACTOME_KERATAN_SULFATE_BIOSYNTHESIS	0.0495495	0.0487805
REACTOME	REACTOME_TRANSCRIPTION_COUPLED_NER_TC_NER	0.0495495	0.0487805
REACTOME	REACTOME_IRON_UPTAKE_AND_TRANSPORT	0.0495495	0.0487805
REACTOME	REACTOME_PYRIMIDINE_METABOLISM	0.0495495	0.0487805
REACTOME	REACTOME_INHIBITION_OF_VOLTAGE_GATED_CA2_CHANNELS_VIA_GBETA_GAMMA_SUBUNITS	0.0495495	0
REACTOME	REACTOME_PRE_NOTCH_PROCESSING_IN_GOLGI	0.0472973	0.292683
REACTOME	REACTOME_CYTOSOLIC_TRNA_AMINOACYLATION	0.0472973	0.292683
BIOCARTA	BIOCARTA_HCMV_PATHWAY	0.0472973	0.243902
KEGG	KEGG_MISMATCH_REPAIR	0.0472973	0.219512
REACTOME	REACTOME_GRB2_SOS_PROVIDES_LINKAGE_TO_MAPK_SIGNALING_FOR_INTERGRINS_	0.0472973	0.219512
PID	PID_NFKAPPAB_ATYPICAL_PATHWAY	0.0472973	0.219512
BIOCARTA	BIOCARTA_UCALPAIN_PATHWAY	0.0472973	0.195122
REACTOME	REACTOME_MRNA_3_END_PROCESSING	0.0472973	0.195122
REACTOME	REACTOME_VEGF_LIGAND_RECEPTOR_INTERACTIONS	0.0472973	0.170732
REACTOME	REACTOME_PURINE_METABOLISM	0.0472973	0.170732
BIOCARTA	BIOCARTA_RAS_PATHWAY	0.0472973	0.146341
KEGG	KEGG_HOMOLOGOUS_RECOMBINATION	0.0472973	0.121951
BIOCARTA	BIOCARTA_PYK2_PATHWAY	0.0472973	0.121951
REACTOME	REACTOME_ASSEMBLY_OF_THE_PRE_REPLICATIVE_COMPLEX	0.0472973	0.121951
KEGG	KEGG_GLYCINE_SERINE_AND_THREONINE_METABOLISM	0.0472973	0.097561
REACTOME	REACTOME_GAP_JUNCTION_TRAFFICKING	0.0472973	0.097561
REACTOME	REACTOME_IL_7_SIGNALING	0.0472973	0.0731707
REACTOME	REACTOME_SIGNALLING_TO_P38_VIA_RIT_AND_RIN	0.0472973	0.0731707
REACTOME	REACTOME_POST_TRANSLATIONAL_MODIFICATION_SYNTHESIS_OF_GPI_ANCHORED_PROTEINS	0.0472973	0.0731707
REACTOME	REACTOME_REGULATION_OF_GENE_EXPRESSION_IN_BETA_CELLS	0.0472973	0.0487805
REACTOME	REACTOME_G1_PHASE	0.0472973	0.0487805
REACTOME	REACTOME_ACTIVATION_OF_BH3_ONLY_PROTEINS	0.0472973	0.0487805
PID	PID_ANTHRAX_PATHWAY	0.0472973	0.0487805
BIOCARTA	BIOCARTA_RARRXR_PATHWAY	0.045045	0.292683
REACTOME	REACTOME_INFLAMMASOMES	0.045045	0.268293
BIOCARTA	BIOCARTA_MTA3_PATHWAY	0.045045	0.170732
REACTOME	REACTOME_EGFR_DOWNREGULATION	0.045045	0.170732
BIOCARTA	BIOCARTA_BARRESTIN_SRC_PATHWAY	0.045045	0.146341
REACTOME	REACTOME_REGULATION_OF_SIGNALING_BY_CBL	0.045045	0.146341
REACTOME	REACTOME_PREFOLDIN_MEDIATED_TRANSFER_OF_SUBSTRATE_TO_CCT_TRIC	0.045045	0.121951
REACTOME	REACTOME_GABA_SYNTHESIS_RELEASE_REUPTAKE_AND_DEGRADATION	0.045045	0.121951
KEGG	KEGG_NITROGEN_METABOLISM	0.045045	0.097561
REACTOME	REACTOME_P53_INDEPENDENT_G1_S_DNA_DAMAGE_CHECKPOINT	0.045045	0.097561
REACTOME	REACTOME_CLEAVAGE_OF_GROWING_TRANSCRIPT_IN_THE_TERMINATION_REGION_	0.045045	0.097561
KEGG	KEGG_REGULATION_OF_AUTOPHAGY	0.045045	0.0487805
REACTOME	REACTOME_PLATELET_SENSITIZATION_BY_LDL	0.045045	0.0487805
REACTOME	REACTOME_ANTIGEN_PRESENTATION_FOLDING_ASSEMBLY_AND_PEPTIDE_LOADING_OF_CLASS_I_MHC	0.0427928	0.292683
REACTOME	REACTOME_SEMA3A_PAK_DEPENDENT_AXON_REPULSION	0.0427928	0.195122
BIOCARTA	BIOCARTA_NTHI_PATHWAY	0.0427928	0.170732
BIOCARTA	BIOCARTA_HDAC_PATHWAY	0.0427928	0.146341
BIOCARTA	BIOCARTA_IL1R_PATHWAY	0.0427928	0.146341
BIOCARTA	BIOCARTA_SHH_PATHWAY	0.0427928	0.146341
REACTOME	REACTOME_SHC1_EVENTS_IN_EGFR_SIGNALING	0.0427928	0.146341
PID	PID_TCR_RAS_PATHWAY	0.0427928	0.146341
BIOCARTA	BIOCARTA_ACH_PATHWAY	0.0427928	0.121951
REACTOME	REACTOME_N_GLYCAN_ANTENNAE_ELONGATION_IN_THE_MEDIAL_TRANS_GOLGI	0.0427928	0.121951
PID	PID_ARF_3PATHWAY	0.0427928	0.121951
REACTOME	REACTOME_APC_C_CDH1_MEDIATED_DEGRADATION_OF_CDC20_AND_OTHER_APC_C_CDH1_TARGETED_PROTEINS_IN_LATE_MITOSIS_EARLY_G1	0.0427928	0.097561
BIOCARTA	BIOCARTA_GABA_PATHWAY	0.0427928	0.0731707
REACTOME	REACTOME_TRAF6_MEDIATED_IRF7_ACTIVATION	0.0427928	0.0731707
REACTOME	REACTOME_TCA_CYCLE_AND_RESPIRATORY_ELECTRON_TRANSPORT	0.0427928	0.0487805
REACTOME	REACTOME_REGULATION_OF_IFNA_SIGNALING	0.0427928	0.0487805
REACTOME	REACTOME_GLUCAGON_TYPE_LIGAND_RECEPTORS	0.0427928	0.0243902
KEGG	KEGG_LINOLEIC_ACID_METABOLISM	0.0427928	0
REACTOME	REACTOME_RNA_POL_II_PRE_TRANSCRIPTION_EVENTS	0.0427928	0
BIOCARTA	BIOCARTA_IL6_PATHWAY	0.0405405	0.219512
BIOCARTA	BIOCARTA_MONOCYTE_PATHWAY	0.0405405	0.219512
REACTOME	REACTOME_FORMATION_OF_TUBULIN_FOLDING_INTERMEDIATES_BY_CCT_TRIC	0.0405405	0.219512
BIOCARTA	BIOCARTA_NGF_PATHWAY	0.0405405	0.195122
PID	PID_VEGF_VEGFR_PATHWAY	0.0405405	0.195122
BIOCARTA	BIOCARTA_EPHA4_PATHWAY	0.0405405	0.170732
PID	PID_WNT_CANONICAL_PATHWAY	0.0405405	0.170732
REACTOME	REACTOME_DSCAM_INTERACTIONS	0.0405405	0.121951
BIOCARTA	BIOCARTA_MPR_PATHWAY	0.0405405	0.097561
REACTOME	REACTOME_BASIGIN_INTERACTIONS	0.0405405	0.097561
REACTOME	REACTOME_GLYCOLYSIS	0.0405405	0.097561
KEGG	KEGG_SPHINGOLIPID_METABOLISM	0.0405405	0.0731707
REACTOME	REACTOME_IONOTROPIC_ACTIVITY_OF_KAINATE_RECEPTORS	0.0405405	0.0731707
PID	KEGG_SPHINGOLIPID_METABOLISM	0.0405405	0.0731707
KEGG	KEGG_GLYCOSAMINOGLYCAN_BIOSYNTHESIS_CHONDROITIN_SULFATE	0.0405405	0.0487805
KEGG	KEGG_PANTOTHENATE_AND_COA_BIOSYNTHESIS	0.0405405	0.0487805
REACTOME	REACTOME_SIGNALING_BY_BMP	0.0405405	0.0487805
BIOCARTA	BIOCARTA_EGFR_SMRTE_PATHWAY	0.0382883	0.292683
REACTOME	REACTOME_P130CAS_LINKAGE_TO_MAPK_SIGNALING_FOR_INTEGRINS	0.0382883	0.243902
BIOCARTA	BIOCARTA_AKAPCENTROSOME_PATHWAY	0.0382883	0.219512
BIOCARTA	BIOCARTA_PS1_PATHWAY	0.0382883	0.195122
REACTOME	REACTOME_ROLE_OF_SECOND_MESSENGERS_IN_NETRIN1_SIGNALING	0.0382883	0.195122
BIOCARTA	BIOCARTA_MCM_PATHWAY	0.0382883	0.170732
REACTOME	REACTOME_APOPTOTIC_CLEAVAGE_OF_CELL_ADHESION_PROTEINS	0.0382883	0.170732
REACTOME	REACTOME_ACTIVATED_AMPK_STIMULATES_FATTY_ACID_OXIDATION_IN_MUSCLE	0.0382883	0.146341
REACTOME	REACTOME_INSULIN_SYNTHESIS_AND_PROCESSING	0.0382883	0.121951
BIOCARTA	BIOCARTA_NKCELLS_PATHWAY	0.0382883	0.097561
BIOCARTA	BIOCARTA_LONGEVITY_PATHWAY	0.0382883	0.097561
BIOCARTA	BIOCARTA_RACCYCD_PATHWAY	0.0382883	0.0731707
REACTOME	REACTOME_METAL_ION_SLC_TRANSPORTERS	0.0382883	0.0487805
REACTOME	REACTOME_RNA_POL_I_PROMOTER_OPENING	0.0382883	0.0487805
PID	PID_ALK1_PATHWAY	0.0382883	0.0487805
BIOCARTA	BIOCARTA_RNA_PATHWAY	0.0382883	0.0243902
REACTOME	REACTOME_FGFR_LIGAND_BINDING_AND_ACTIVATION	0.0382883	0.0243902
BIOCARTA	BIOCARTA_NKT_PATHWAY	0.0382883	0
REACTOME	REACTOME_SEMA3A_PLEXIN_REPULSION_SIGNALING_BY_INHIBITING_INTEGRIN_ADHESION	0.036036	0.292683
REACTOME	REACTOME_SYNTHESIS_OF_PIPS_AT_THE_EARLY_ENDOSOME_MEMBRANE	0.036036	0.243902
REACTOME	REACTOME_MITOCHONDRIAL_TRNA_AMINOACYLATION	0.036036	0.195122
REACTOME	REACTOME_ROLE_OF_DCC_IN_REGULATING_APOPTOSIS	0.036036	0.195122
PID	PID_SYNDECAN_3_PATHWAY	0.036036	0.170732
REACTOME	REACTOME_SMOOTH_MUSCLE_CONTRACTION	0.036036	0.146341
BIOCARTA	BIOCARTA_CASPASE_PATHWAY	0.036036	0.121951
REACTOME	REACTOME_LATENT_INFECTION_OF_HOMO_SAPIENS_WITH_MYCOBACTERIUM_TUBERCULOSIS	0.036036	0.121951
REACTOME	REACTOME_RNA_POL_III_TRANSCRIPTION	0.036036	0.121951
REACTOME	REACTOME_MRNA_SPLICING_MINOR_PATHWAY	0.036036	0.121951
REACTOME	REACTOME_PLATELET_ADHESION_TO_EXPOSED_COLLAGEN	0.036036	0.097561
REACTOME	REACTOME_NONSENSE_MEDIATED_DECAY_ENHANCED_BY_THE_EXON_JUNCTION_COMPLEX	0.036036	0.097561
BIOCARTA	BIOCARTA_CDMAC_PATHWAY	0.036036	0.0731707
BIOCARTA	BIOCARTA_NFKB_PATHWAY	0.036036	0.0731707
PID	PID_TCR_CALCIUM_PATHWAY	0.036036	0.0731707
PID	PID_INSULIN_GLUCOSE_PATHWAY	0.036036	0.0731707
REACTOME	REACTOME_TGF_BETA_RECEPTOR_SIGNALING_ACTIVATES_SMADS	0.036036	0.0487805
REACTOME	REACTOME_FORMATION_OF_TRANSCRIPTION_COUPLED_NER_TC_NER_REPAIR_COMPLEX	0.036036	0
BIOCARTA	BIOCARTA_PTEN_PATHWAY	0.0337838	0.121951
REACTOME	REACTOME_RECYCLING_OF_BILE_ACIDS_AND_SALTS	0.0337838	0.121951
REACTOME	REACTOME_SOS_MEDIATED_SIGNALLING	0.0337838	0.121951
REACTOME	REACTOME_ENERGY_DEPENDENT_REGULATION_OF_MTOR_BY_LKB1_AMPK	0.0337838	0.097561
REACTOME	REACTOME_PRESYNAPTIC_NICOTINIC_ACETYLCHOLINE_RECEPTORS	0.0337838	0.097561
REACTOME	REACTOME_TRANSLATION	0.0337838	0.0731707
REACTOME	REACTOME_SPHINGOLIPID_DE_NOVO_BIOSYNTHESIS	0.0337838	0.0731707
REACTOME	REACTOME_SCF_BETA_TRCP_MEDIATED_DEGRADATION_OF_EMI1	0.0337838	0.0731707
PID	REACTOME_SPHINGOLIPID_DE_NOVO_BIOSYNTHESIS	0.0337838	0.0731707
REACTOME	REACTOME_ACETYLCHOLINE_BINDING_AND_DOWNSTREAM_EVENTS	0.0337838	0.0487805
REACTOME	REACTOME_FORMATION_OF_RNA_POL_II_ELONGATION_COMPLEX_	0.0337838	0.0487805
PID	PID_HIV_NEF_PATHWAY	0.0337838	0.0487805
Hallmark	HALLMARK_OXIDATIVE_PHOSPHORYLATION	0.0337838	0.0243902
REACTOME	REACTOME_ELEVATION_OF_CYTOSOLIC_CA2_LEVELS	0.0315315	0.268293
REACTOME	REACTOME_RECEPTOR_LIGAND_BINDING_INITIATES_THE_SECOND_PROTEOLYTIC_CLEAVAGE_OF_NOTCH_RECEPTOR	0.0315315	0.243902
PID	PID_CIRCADIAN_PATHWAY	0.0315315	0.243902
BIOCARTA	BIOCARTA_BARR_MAPK_PATHWAY	0.0315315	0.219512
REACTOME	REACTOME_HYALURONAN_METABOLISM	0.0315315	0.219512
REACTOME	REACTOME_POST_CHAPERONIN_TUBULIN_FOLDING_PATHWAY	0.0315315	0.219512
REACTOME	REACTOME_DEADENYLATION_OF_MRNA	0.0315315	0.219512
REACTOME	REACTOME_TAK1_ACTIVATES_NFKB_BY_PHOSPHORYLATION_AND_ACTIVATION_OF_IKKS_COMPLEX	0.0315315	0.219512
KEGG	KEGG_INTESTINAL_IMMUNE_NETWORK_FOR_IGA_PRODUCTION	0.0315315	0.195122
BIOCARTA	BIOCARTA_EPO_PATHWAY	0.0315315	0.170732
REACTOME	REACTOME_XENOBIOTICS	0.0315315	0.170732
REACTOME	REACTOME_DCC_MEDIATED_ATTRACTIVE_SIGNALING	0.0315315	0.170732
KEGG	KEGG_NON_HOMOLOGOUS_END_JOINING	0.0315315	0.146341
REACTOME	REACTOME_SIGNAL_REGULATORY_PROTEIN_SIRP_FAMILY_INTERACTIONS	0.0315315	0.146341
REACTOME	REACTOME_DESTABILIZATION_OF_MRNA_BY_AUF1_HNRNP_D0	0.0315315	0.146341
KEGG	KEGG_PENTOSE_PHOSPHATE_PATHWAY	0.0315315	0.121951
BIOCARTA	BIOCARTA_PLCE_PATHWAY	0.0315315	0.121951
REACTOME	REACTOME_NEF_MEDIATES_DOWN_MODULATION_OF_CELL_SURFACE_RECEPTORS_BY_RECRUITING_THEM_TO_CLATHRIN_ADAPTERS	0.0315315	0.121951
REACTOME	REACTOME_SYNTHESIS_OF_PC	0.0315315	0.121951
BIOCARTA	BIOCARTA_CCR5_PATHWAY	0.0315315	0.097561
KEGG	KEGG_GLUTATHIONE_METABOLISM	0.0315315	0.0731707
REACTOME	REACTOME_SHC_RELATED_EVENTS	0.0315315	0.0731707
KEGG	KEGG_GLYCOSYLPHOSPHATIDYLINOSITOL_GPI_ANCHOR_BIOSYNTHESIS	0.0315315	0.0487805
KEGG	KEGG_PARKINSONS_DISEASE	0.0315315	0.0487805
BIOCARTA	BIOCARTA_LYM_PATHWAY	0.0315315	0.0487805
REACTOME	REACTOME_SIGNALING_BY_WNT	0.0315315	0.0487805
REACTOME	REACTOME_SMAD2_SMAD3_SMAD4_HETEROTRIMER_REGULATES_TRANSCRIPTION	0.0315315	0
BIOCARTA	BIOCARTA_ETS_PATHWAY	0.0292793	0.317073
REACTOME	REACTOME_CTLA4_INHIBITORY_SIGNALING	0.0292793	0.146341
BIOCARTA	BIOCARTA_THELPER_PATHWAY	0.0292793	0.121951
REACTOME	REACTOME_CDT1_ASSOCIATION_WITH_THE_CDC6_ORC_ORIGIN_COMPLEX	0.0292793	0.121951
BIOCARTA	BIOCARTA_TRKA_PATHWAY	0.0292793	0.097561
REACTOME	REACTOME_AUTODEGRADATION_OF_CDH1_BY_CDH1_APC_C	0.0292793	0.097561
KEGG	KEGG_HISTIDINE_METABOLISM	0.0292793	0.0731707
BIOCARTA	BIOCARTA_CELLCYCLE_PATHWAY	0.0292793	0.0731707
REACTOME	REACTOME_CROSS_PRESENTATION_OF_SOLUBLE_EXOGENOUS_ANTIGENS_ENDOSOMES	0.0292793	0.0731707
REACTOME	REACTOME_SYNTHESIS_OF_GLYCOSYLPHOSPHATIDYLINOSITOL_GPI	0.0292793	0.0731707
REACTOME	REACTOME_PROLACTIN_RECEPTOR_SIGNALING	0.0292793	0.0487805
REACTOME	REACTOME_CYCLIN_E_ASSOCIATED_EVENTS_DURING_G1_S_TRANSITION_	0.0292793	0.0487805
REACTOME	REACTOME_RNA_POL_II_TRANSCRIPTION_PRE_INITIATION_AND_PROMOTER_OPENING	0.0292793	0.0487805
REACTOME	REACTOME_INHIBITION_OF_INSULIN_SECRETION_BY_ADRENALINE_NORADRENALINE	0.0292793	0.0487805
PID	PID_DNA_PK_PATHWAY	0.0292793	0.0487805
KEGG	KEGG_RIBOFLAVIN_METABOLISM	0.0292793	0.0243902
REACTOME	REACTOME_DOWNREGULATION_OF_TGF_BETA_RECEPTOR_SIGNALING	0.0292793	0.0243902
REACTOME	REACTOME_ELONGATION_ARREST_AND_RECOVERY	0.0292793	0.0243902
BIOCARTA	BIOCARTA_CTLA4_PATHWAY	0.0292793	0
REACTOME	REACTOME_SIGNAL_AMPLIFICATION	0.0292793	0
BIOCARTA	BIOCARTA_PTDINS_PATHWAY	0.027027	0.219512
REACTOME	REACTOME_SIGNALING_BY_NOTCH4	0.027027	0.219512
REACTOME	REACTOME_THE_NLRP3_INFLAMMASOME	0.027027	0.219512
REACTOME	REACTOME_SYNTHESIS_OF_PIPS_AT_THE_LATE_ENDOSOME_MEMBRANE	0.027027	0.195122
REACTOME	REACTOME_SYNTHESIS_OF_BILE_ACIDS_AND_BILE_SALTS	0.027027	0.170732
REACTOME	REACTOME_CASPASE_MEDIATED_CLEAVAGE_OF_CYTOSKELETAL_PROTEINS	0.027027	0.170732
BIOCARTA	BIOCARTA_IL4_PATHWAY	0.027027	0.146341
BIOCARTA	BIOCARTA_LEPTIN_PATHWAY	0.027027	0.146341
KEGG	KEGG_GLYCOSAMINOGLYCAN_DEGRADATION	0.027027	0.121951
BIOCARTA	BIOCARTA_ARAP_PATHWAY	0.027027	0.121951
BIOCARTA	BIOCARTA_BCELLSURVIVAL_PATHWAY	0.027027	0.121951
REACTOME	REACTOME_RNA_POL_I_TRANSCRIPTION_INITIATION	0.027027	0.121951
Hallmark	HALLMARK_REACTIVE_OXIGEN_SPECIES_PATHWAY	0.027027	0.097561
BIOCARTA	BIOCARTA_RELA_PATHWAY	0.027027	0.097561
BIOCARTA	BIOCARTA_TCYTOTOXIC_PATHWAY	0.027027	0.097561
REACTOME	REACTOME_NEGATIVE_REGULATORS_OF_RIG_I_MDA5_SIGNALING	0.027027	0.097561
BIOCARTA	BIOCARTA_IGF1MTOR_PATHWAY	0.027027	0.0731707
REACTOME	REACTOME_LYSOSOME_VESICLE_BIOGENESIS	0.027027	0.0731707
REACTOME	REACTOME_ORGANIC_CATION_ANION_ZWITTERION_TRANSPORT	0.027027	0.0731707
REACTOME	REACTOME_PACKAGING_OF_TELOMERE_ENDS	0.027027	0.0731707
PID	PID_CD40_PATHWAY	0.027027	0.0731707
PID	PID_S1P_S1P2_PATHWAY	0.027027	0.0731707
BIOCARTA	BIOCARTA_IL12_PATHWAY	0.027027	0.0487805
BIOCARTA	BIOCARTA_VIP_PATHWAY	0.027027	0.0487805
BIOCARTA	BIOCARTA_STRESS_PATHWAY	0.027027	0.0487805
REACTOME	REACTOME_GAP_JUNCTION_ASSEMBLY	0.027027	0.0487805
PID	PID_THROMBIN_PAR4_PATHWAY	0.027027	0.0487805
REACTOME	REACTOME_SEROTONIN_RECEPTORS	0.027027	0.0243902
REACTOME	REACTOME_G_BETA_GAMMA_SIGNALLING_THROUGH_PLC_BETA	0.027027	0.0243902
REACTOME	REACTOME_TIGHT_JUNCTION_INTERACTIONS	0.027027	0.0243902
REACTOME	REACTOME_BIOSYNTHESIS_OF_THE_N_GLYCAN_PRECURSOR_DOLICHOL_LIPID_LINKED_OLIGOSACCHARIDE_LLO_AND_TRANSFER_TO_A_NASCENT_PROTEIN	0.027027	0
PID	REACTOME_BIOSYNTHESIS_OF_THE_N_GLYCAN_PRECURSOR_DOLICHOL_LIPID_LINKED_OLIGOSACCHARIDE_LLO_AND_TRANSFER_TO_A_NASCENT_PROTEIN	0.027027	0
BIOCARTA	BIOCARTA_IL3_PATHWAY	0.0247748	0.195122
BIOCARTA	BIOCARTA_BARRESTIN_PATHWAY	0.0247748	0.195122
REACTOME	REACTOME_ER_PHAGOSOME_PATHWAY	0.0247748	0.195122
REACTOME	REACTOME_JNK_C_JUN_KINASES_PHOSPHORYLATION_AND_ACTIVATION_MEDIATED_BY_ACTIVATED_HUMAN_TAK1	0.0247748	0.195122
BIOCARTA	BIOCARTA_MEF2D_PATHWAY	0.0247748	0.170732
REACTOME	REACTOME_SIGNAL_ATTENUATION	0.0247748	0.170732
REACTOME	REACTOME_MAPK_TARGETS_NUCLEAR_EVENTS_MEDIATED_BY_MAP_KINASES	0.0247748	0.146341
PID	PID_TCR_JNK_PATHWAY	0.0247748	0.146341
PID	PID_SMAD2_3PATHWAY	0.0247748	0.146341
REACTOME	REACTOME_G0_AND_EARLY_G1	0.0247748	0.121951
REACTOME	REACTOME_REGULATION_OF_HYPOXIA_INDUCIBLE_FACTOR_HIF_BY_OXYGEN	0.0247748	0.121951
REACTOME	REACTOME_DOWNREGULATION_OF_SMAD2_3_SMAD4_TRANSCRIPTIONAL_ACTIVITY	0.0247748	0.121951
REACTOME	REACTOME_ACTIVATION_OF_THE_MRNA_UPON_BINDING_OF_THE_CAP_BINDING_COMPLEX_AND_EIFS_AND_SUBSEQUENT_BINDING_TO_43S	0.0247748	0.121951
REACTOME	REACTOME_INITIAL_TRIGGERING_OF_COMPLEMENT	0.0247748	0.121951
KEGG	KEGG_RNA_POLYMERASE	0.0247748	0.097561
KEGG	KEGG_PROTEASOME	0.0247748	0.097561
REACTOME	REACTOME_N_GLYCAN_ANTENNAE_ELONGATION	0.0247748	0.097561
REACTOME	REACTOME_INHIBITION_OF_REPLICATION_INITIATION_OF_DAMAGED_DNA_BY_RB1_E2F1	0.0247748	0.097561
BIOCARTA	BIOCARTA_DEATH_PATHWAY	0.0247748	0.0731707
REACTOME	REACTOME_3_UTR_MEDIATED_TRANSLATIONAL_REGULATION	0.0247748	0.0731707
REACTOME	REACTOME_TRAF6_MEDIATED_INDUCTION_OF_TAK1_COMPLEX	0.0247748	0.0731707
REACTOME	REACTOME_RNA_POL_III_TRANSCRIPTION_INITIATION_FROM_TYPE_3_PROMOTER	0.0247748	0.0731707
BIOCARTA	BIOCARTA_ARENRF2_PATHWAY	0.0247748	0.0487805
REACTOME	REACTOME_SIGNALING_BY_NODAL	0.0247748	0.0487805
REACTOME	REACTOME_PROCESSING_OF_CAPPED_INTRONLESS_PRE_MRNA	0.0247748	0.0487805
REACTOME	REACTOME_DEPOSITION_OF_NEW_CENPA_CONTAINING_NUCLEOSOMES_AT_THE_CENTROMERE	0.0247748	0.0487805
REACTOME	REACTOME_MRNA_CAPPING	0.0247748	0.0243902
REACTOME	REACTOME_ACYL_CHAIN_REMODELLING_OF_PC	0.0247748	0
REACTOME	REACTOME_AMINE_DERIVED_HORMONES	0.0247748	0
REACTOME	REACTOME_HORMONE_LIGAND_BINDING_RECEPTORS	0.0247748	0
REACTOME	REACTOME_THROMBIN_SIGNALLING_THROUGH_PROTEINASE_ACTIVATED_RECEPTORS_PARS	0.0247748	0
REACTOME	REACTOME_FATTY_ACYL_COA_BIOSYNTHESIS	0.0225225	0.243902
REACTOME	REACTOME_SIGNALING_BY_NOTCH2	0.0225225	0.195122
BIOCARTA	BIOCARTA_AGPCR_PATHWAY	0.0225225	0.170732
REACTOME	REACTOME_ACTIVATED_TAK1_MEDIATES_P38_MAPK_ACTIVATION	0.0225225	0.170732
BIOCARTA	BIOCARTA_CALCINEURIN_PATHWAY	0.0225225	0.146341
REACTOME	REACTOME_ENDOGENOUS_STEROLS	0.0225225	0.146341
REACTOME	REACTOME_GLYCOGEN_BREAKDOWN_GLYCOGENOLYSIS	0.0225225	0.121951
REACTOME	REACTOME_ABACAVIR_TRANSPORT_AND_METABOLISM	0.0225225	0.121951
PID	PID_IL5_PATHWAY	0.0225225	0.121951
REACTOME	REACTOME_NUCLEAR_EVENTS_KINASE_AND_TRANSCRIPTION_FACTOR_ACTIVATION	0.0225225	0.097561
REACTOME	REACTOME_HIGHLY_CALCIUM_PERMEABLE_POSTSYNAPTIC_NICOTINIC_ACETYLCHOLINE_RECEPTORS	0.0225225	0.097561
REACTOME	REACTOME_TRANSPORT_OF_ORGANIC_ANIONS	0.0225225	0.097561
REACTOME	REACTOME_LAGGING_STRAND_SYNTHESIS	0.0225225	0.097561
REACTOME	REACTOME_TANDEM_PORE_DOMAIN_POTASSIUM_CHANNELS	0.0225225	0.097561
BIOCARTA	BIOCARTA_NDKDYNAMIN_PATHWAY	0.0225225	0.0731707
REACTOME	REACTOME_REGULATION_OF_AMPK_ACTIVITY_VIA_LKB1	0.0225225	0.0731707
REACTOME	REACTOME_SHC_MEDIATED_SIGNALLING	0.0225225	0.0731707
BIOCARTA	BIOCARTA_NO2IL12_PATHWAY	0.0225225	0.0487805
REACTOME	REACTOME_GLUTAMATE_NEUROTRANSMITTER_RELEASE_CYCLE	0.0225225	0.0487805
REACTOME	REACTOME_FORMATION_OF_THE_HIV1_EARLY_ELONGATION_COMPLEX	0.0225225	0.0487805
KEGG	KEGG_OXIDATIVE_PHOSPHORYLATION	0.0225225	0.0243902
BIOCARTA	BIOCARTA_TH1TH2_PATHWAY	0.0225225	0.0243902
REACTOME	REACTOME_CHEMOKINE_RECEPTORS_BIND_CHEMOKINES	0.0225225	0.0243902
REACTOME	REACTOME_G_BETA_GAMMA_SIGNALLING_THROUGH_PI3KGAMMA	0.0225225	0.0243902
KEGG	KEGG_ALPHA_LINOLENIC_ACID_METABOLISM	0.0225225	0
BIOCARTA	BIOCARTA_CYTOKINE_PATHWAY	0.0225225	0
REACTOME	REACTOME_ADP_SIGNALLING_THROUGH_P2RY1	0.0225225	0
REACTOME	REACTOME_PROSTACYCLIN_SIGNALLING_THROUGH_PROSTACYCLIN_RECEPTOR	0.0225225	0
REACTOME	REACTOME_INCRETIN_SYNTHESIS_SECRETION_AND_INACTIVATION	0.0225225	0
BIOCARTA	BIOCARTA_CARM1_PATHWAY	0.0202703	0.219512
KEGG	KEGG_ALLOGRAFT_REJECTION	0.0202703	0.195122
BIOCARTA	BIOCARTA_EIF_PATHWAY	0.0202703	0.195122
REACTOME	REACTOME_RAP1_SIGNALLING	0.0202703	0.195122
REACTOME	REACTOME_DOWNREGULATION_OF_ERBB2_ERBB3_SIGNALING	0.0202703	0.170732
BIOCARTA	BIOCARTA_MAL_PATHWAY	0.0202703	0.146341
REACTOME	REACTOME_MTORC1_MEDIATED_SIGNALLING	0.0202703	0.146341
BIOCARTA	BIOCARTA_GRANULOCYTES_PATHWAY	0.0202703	0.121951
REACTOME	REACTOME_REGULATION_OF_INSULIN_SECRETION_BY_ACETYLCHOLINE	0.0202703	0.121951
PID	PID_S1P_META_PATHWAY	0.0202703	0.121951
BIOCARTA	BIOCARTA_ERK5_PATHWAY	0.0202703	0.097561
REACTOME	REACTOME_PROCESSING_OF_INTRONLESS_PRE_MRNAS	0.0202703	0.097561
REACTOME	REACTOME_ERK_MAPK_TARGETS	0.0202703	0.097561
REACTOME	REACTOME_FORMATION_OF_INCISION_COMPLEX_IN_GG_NER	0.0202703	0.097561
BIOCARTA	BIOCARTA_CERAMIDE_PATHWAY	0.0202703	0.0731707
REACTOME	REACTOME_REGULATION_OF_KIT_SIGNALING	0.0202703	0.0731707
REACTOME	REACTOME_SULFUR_AMINO_ACID_METABOLISM	0.0202703	0.0731707
REACTOME	REACTOME_MICRORNA_MIRNA_BIOGENESIS	0.0202703	0.0731707
REACTOME	REACTOME_P38MAPK_EVENTS	0.0202703	0.0487805
REACTOME	REACTOME_DARPP_32_EVENTS	0.0202703	0.0487805
KEGG	KEGG_PHENYLALANINE_METABOLISM	0.0202703	0.0243902
REACTOME	REACTOME_CTNNB1_PHOSPHORYLATION_CASCADE	0.0202703	0.0243902
REACTOME	REACTOME_ACYL_CHAIN_REMODELLING_OF_PE	0.0202703	0
KEGG	KEGG_VALINE_LEUCINE_AND_ISOLEUCINE_BIOSYNTHESIS	0.018018	0.243902
REACTOME	REACTOME_CELL_EXTRACELLULAR_MATRIX_INTERACTIONS	0.018018	0.195122
REACTOME	REACTOME_TRAF3_DEPENDENT_IRF_ACTIVATION_PATHWAY	0.018018	0.170732
REACTOME	REACTOME_TRAF6_MEDIATED_NFKB_ACTIVATION	0.018018	0.146341
REACTOME	REACTOME_RNA_POL_III_TRANSCRIPTION_INITIATION_FROM_TYPE_2_PROMOTER	0.018018	0.121951
REACTOME	REACTOME_INHIBITION_OF_THE_PROTEOLYTIC_ACTIVITY_OF_APC_C_REQUIRED_FOR_THE_ONSET_OF_ANAPHASE_BY_MITOTIC_SPINDLE_CHECKPOINT_COMPONENTS	0.018018	0.121951
REACTOME	REACTOME_THE_ACTIVATION_OF_ARYLSULFATASES	0.018018	0.121951
REACTOME	REACTOME_REPAIR_SYNTHESIS_FOR_GAP_FILLING_BY_DNA_POL_IN_TC_NER	0.018018	0.121951
REACTOME	REACTOME_ETHANOL_OXIDATION	0.018018	0.121951
REACTOME	REACTOME_SPRY_REGULATION_OF_FGF_SIGNALING	0.018018	0.097561
REACTOME	REACTOME_KERATAN_SULFATE_DEGRADATION	0.018018	0.097561
REACTOME	REACTOME_RNA_POL_III_TRANSCRIPTION_TERMINATION	0.018018	0.097561
REACTOME	REACTOME_APC_CDC20_MEDIATED_DEGRADATION_OF_NEK2A	0.018018	0.097561
BIOCARTA	BIOCARTA_CDC42RAC_PATHWAY	0.018018	0.0731707
REACTOME	REACTOME_PYRIMIDINE_CATABOLISM	0.018018	0.0731707
REACTOME	REACTOME_CREATION_OF_C4_AND_C2_ACTIVATORS	0.018018	0.0731707
REACTOME	REACTOME_SCFSKP2_MEDIATED_DEGRADATION_OF_P27_P21	0.018018	0.0731707
PID	PID_PRL_SIGNALING_EVENTS_PATHWAY	0.018018	0.0731707
BIOCARTA	BIOCARTA_CTL_PATHWAY	0.018018	0.0487805
REACTOME	REACTOME_ACYL_CHAIN_REMODELLING_OF_PG	0.018018	0.0487805
REACTOME	REACTOME_ACETYLCHOLINE_NEUROTRANSMITTER_RELEASE_CYCLE	0.018018	0.0487805
KEGG	KEGG_BIOSYNTHESIS_OF_UNSATURATED_FATTY_ACIDS	0.018018	0.0243902
KEGG	KEGG_SNARE_INTERACTIONS_IN_VESICULAR_TRANSPORT	0.018018	0.0243902
REACTOME	REACTOME_RESPIRATORY_ELECTRON_TRANSPORT	0.018018	0.0243902
REACTOME	REACTOME_ACTIVATION_OF_IRF3_IRF7_MEDIATED_BY_TBK1_IKK_EPSILON	0.018018	0.0243902
BIOCARTA	BIOCARTA_IL17_PATHWAY	0.018018	0
REACTOME	REACTOME_DEFENSINS	0.018018	0
REACTOME	REACTOME_SYNTHESIS_SECRETION_AND_INACTIVATION_OF_GLP1	0.018018	0
REACTOME	REACTOME_ENDOSOMAL_SORTING_COMPLEX_REQUIRED_FOR_TRANSPORT_ESCRT	0.018018	0
KEGG	KEGG_CIRCADIAN_RHYTHM_MAMMAL	0.0157658	0.268293
BIOCARTA	BIOCARTA_IL22BP_PATHWAY	0.0157658	0.268293
BIOCARTA	BIOCARTA_FEEDER_PATHWAY	0.0157658	0.243902
REACTOME	REACTOME_G2_M_DNA_DAMAGE_CHECKPOINT	0.0157658	0.219512
REACTOME	REACTOME_RECRUITMENT_OF_NUMA_TO_MITOTIC_CENTROSOMES	0.0157658	0.195122
KEGG	KEGG_ONE_CARBON_POOL_BY_FOLATE	0.0157658	0.170732
BIOCARTA	BIOCARTA_41BB_PATHWAY	0.0157658	0.170732
REACTOME	REACTOME_PEROXISOMAL_LIPID_METABOLISM	0.0157658	0.170732
PID	REACTOME_PEROXISOMAL_LIPID_METABOLISM	0.0157658	0.170732
BIOCARTA	BIOCARTA_IL10_PATHWAY	0.0157658	0.146341
REACTOME	REACTOME_SYNTHESIS_OF_BILE_ACIDS_AND_BILE_SALTS_VIA_7ALPHA_HYDROXYCHOLESTEROL	0.0157658	0.146341
REACTOME	REACTOME_GAP_JUNCTION_DEGRADATION	0.0157658	0.121951
REACTOME	REACTOME_RIP_MEDIATED_NFKB_ACTIVATION_VIA_DAI	0.0157658	0.121951
REACTOME	REACTOME_PHOSPHORYLATION_OF_THE_APC_C	0.0157658	0.121951
KEGG	KEGG_SELENOAMINO_ACID_METABOLISM	0.0157658	0.097561
BIOCARTA	BIOCARTA_DREAM_PATHWAY	0.0157658	0.097561
BIOCARTA	BIOCARTA_GATA3_PATHWAY	0.0157658	0.0731707
BIOCARTA	BIOCARTA_PGC1A_PATHWAY	0.0157658	0.0731707
REACTOME	REACTOME_CDK_MEDIATED_PHOSPHORYLATION_AND_REMOVAL_OF_CDC6	0.0157658	0.0731707
REACTOME	REACTOME_ENOS_ACTIVATION_AND_REGULATION	0.0157658	0.0731707
REACTOME	REACTOME_REGULATION_OF_ORNITHINE_DECARBOXYLASE_ODC	0.0157658	0.0731707
REACTOME	REACTOME_POL_SWITCHING	0.0157658	0.0731707
REACTOME	REACTOME_ABORTIVE_ELONGATION_OF_HIV1_TRANSCRIPT_IN_THE_ABSENCE_OF_TAT	0.0157658	0.0731707
REACTOME	REACTOME_G1_S_SPECIFIC_TRANSCRIPTION	0.0157658	0.0731707
REACTOME	REACTOME_VIF_MEDIATED_DEGRADATION_OF_APOBEC3G	0.0157658	0.0731707
KEGG	KEGG_GLYCOSPHINGOLIPID_BIOSYNTHESIS_LACTO_AND_NEOLACTO_SERIES	0.0157658	0.0487805
BIOCARTA	BIOCARTA_PROTEASOME_PATHWAY	0.0157658	0.0487805
REACTOME	REACTOME_SRP_DEPENDENT_COTRANSLATIONAL_PROTEIN_TARGETING_TO_MEMBRANE	0.0157658	0.0487805
REACTOME	REACTOME_IKK_COMPLEX_RECRUITMENT_MEDIATED_BY_RIP1	0.0157658	0.0487805
REACTOME	REACTOME_CYTOSOLIC_SULFONATION_OF_SMALL_MOLECULES	0.0157658	0.0487805
PID	KEGG_GLYCOSPHINGOLIPID_BIOSYNTHESIS_LACTO_AND_NEOLACTO_SERIES	0.0157658	0.0487805
KEGG	KEGG_FOLATE_BIOSYNTHESIS	0.0157658	0.0243902
KEGG	KEGG_RIBOSOME	0.0157658	0.0243902
BIOCARTA	BIOCARTA_INFLAM_PATHWAY	0.0157658	0.0243902
REACTOME	REACTOME_NUCLEOTIDE_LIKE_PURINERGIC_RECEPTORS	0.0157658	0.0243902
REACTOME	REACTOME_TRANSFERRIN_ENDOCYTOSIS_AND_RECYCLING	0.0157658	0.0243902
REACTOME	REACTOME_ADP_SIGNALLING_THROUGH_P2RY12	0.0157658	0
REACTOME	REACTOME_BASE_EXCISION_REPAIR	0.0135135	0.219512
REACTOME	REACTOME_UNWINDING_OF_DNA	0.0135135	0.219512
REACTOME	REACTOME_CALNEXIN_CALRETICULIN_CYCLE	0.0135135	0.170732
REACTOME	REACTOME_N_GLYCAN_TRIMMING_IN_THE_ER_AND_CALNEXIN_CALRETICULIN_CYCLE	0.0135135	0.170732
REACTOME	REACTOME_GAMMA_CARBOXYLATION_TRANSPORT_AND_AMINO_TERMINAL_CLEAVAGE_OF_PROTEINS	0.0135135	0.146341
REACTOME	REACTOME_CITRIC_ACID_CYCLE_TCA_CYCLE	0.0135135	0.146341
REACTOME	REACTOME_APC_C_CDC20_MEDIATED_DEGRADATION_OF_CYCLIN_B	0.0135135	0.146341
REACTOME	REACTOME_CONVERSION_FROM_APC_C_CDC20_TO_APC_C_CDH1_IN_LATE_ANAPHASE	0.0135135	0.146341
PID	PID_RANBP2_PATHWAY	0.0135135	0.146341
KEGG	KEGG_PRIMARY_BILE_ACID_BIOSYNTHESIS	0.0135135	0.121951
REACTOME	REACTOME_CD28_DEPENDENT_VAV1_PATHWAY	0.0135135	0.097561
REACTOME	REACTOME_EARLY_PHASE_OF_HIV_LIFE_CYCLE	0.0135135	0.097561
BIOCARTA	BIOCARTA_D4GDI_PATHWAY	0.0135135	0.0731707
REACTOME	REACTOME_FORMATION_OF_THE_TERNARY_COMPLEX_AND_SUBSEQUENTLY_THE_43S_COMPLEX	0.0135135	0.0731707
REACTOME	REACTOME_TRAFFICKING_AND_PROCESSING_OF_ENDOSOMAL_TLR	0.0135135	0.0731707
REACTOME	REACTOME_RETROGRADE_NEUROTROPHIN_SIGNALLING	0.0135135	0.0731707
REACTOME	REACTOME_PROCESSIVE_SYNTHESIS_ON_THE_LAGGING_STRAND	0.0135135	0.0731707
REACTOME	REACTOME_RNA_POL_III_CHAIN_ELONGATION	0.0135135	0.0731707
REACTOME	REACTOME_METABOLISM_OF_PORPHYRINS	0.0135135	0.0731707
BIOCARTA	BIOCARTA_MITOCHONDRIA_PATHWAY	0.0135135	0.0487805
BIOCARTA	BIOCARTA_STATHMIN_PATHWAY	0.0135135	0.0487805
BIOCARTA	BIOCARTA_ACTINY_PATHWAY	0.0135135	0.0487805
REACTOME	REACTOME_PERK_REGULATED_GENE_EXPRESSION	0.0135135	0.0487805
REACTOME	REACTOME_OPSINS	0.0135135	0.0487805
REACTOME	REACTOME_GLUTATHIONE_CONJUGATION	0.0135135	0.0487805
REACTOME	REACTOME_PEPTIDE_CHAIN_ELONGATION	0.0135135	0.0243902
REACTOME	REACTOME_PEPTIDE_HORMONE_BIOSYNTHESIS	0.0135135	0.0243902
REACTOME	REACTOME_EICOSANOID_LIGAND_BINDING_RECEPTORS	0.0135135	0.0243902
REACTOME	REACTOME_INFLUENZA_VIRAL_RNA_TRANSCRIPTION_AND_REPLICATION	0.0135135	0.0243902
REACTOME	REACTOME_SYNTHESIS_SECRETION_AND_DEACYLATION_OF_GHRELIN	0.0135135	0
REACTOME	REACTOME_IL_6_SIGNALING	0.0112613	0.243902
REACTOME	REACTOME_SIGNALING_BY_NOTCH3	0.0112613	0.195122
BIOCARTA	BIOCARTA_CD40_PATHWAY	0.0112613	0.170732
REACTOME	REACTOME_REGULATION_OF_THE_FANCONI_ANEMIA_PATHWAY	0.0112613	0.170732
KEGG	KEGG_STEROID_BIOSYNTHESIS	0.0112613	0.121951
BIOCARTA	BIOCARTA_TNFR2_PATHWAY	0.0112613	0.121951
REACTOME	REACTOME_PECAM1_INTERACTIONS	0.0112613	0.121951
REACTOME	REACTOME_REGULATED_PROTEOLYSIS_OF_P75NTR	0.0112613	0.121951
BIOCARTA	BIOCARTA_HIF_PATHWAY	0.0112613	0.097561
BIOCARTA	BIOCARTA_RANMS_PATHWAY	0.0112613	0.097561
REACTOME	REACTOME_SYNTHESIS_OF_BILE_ACIDS_AND_BILE_SALTS_VIA_24_HYDROXYCHOLESTEROL	0.0112613	0.097561
REACTOME	REACTOME_NEF_MEDIATED_DOWNREGULATION_OF_MHC_CLASS_I_COMPLEX_CELL_SURFACE_EXPRESSION	0.0112613	0.097561
REACTOME	REACTOME_AKT_PHOSPHORYLATES_TARGETS_IN_THE_CYTOSOL	0.0112613	0.097561
REACTOME	REACTOME_BRANCHED_CHAIN_AMINO_ACID_CATABOLISM	0.0112613	0.097561
REACTOME	REACTOME_REGULATION_OF_RHEB_GTPASE_ACTIVITY_BY_AMPK	0.0112613	0.097561
KEGG	KEGG_GLYCOSAMINOGLYCAN_BIOSYNTHESIS_KERATAN_SULFATE	0.0112613	0.0731707
BIOCARTA	BIOCARTA_GLYCOLYSIS_PATHWAY	0.0112613	0.0731707
BIOCARTA	BIOCARTA_TOB1_PATHWAY	0.0112613	0.0731707
REACTOME	REACTOME_MITOCHONDRIAL_FATTY_ACID_BETA_OXIDATION	0.0112613	0.0731707
REACTOME	REACTOME_TETRAHYDROBIOPTERIN_BH4_SYNTHESIS_RECYCLING_SALVAGE_AND_REGULATION	0.0112613	0.0487805
REACTOME	REACTOME_DOPAMINE_NEUROTRANSMITTER_RELEASE_CYCLE	0.0112613	0.0487805
REACTOME	REACTOME_ACTIVATION_OF_GENES_BY_ATF4	0.0112613	0.0487805
BIOCARTA	BIOCARTA_ASBCELL_PATHWAY	0.0112613	0.0243902
REACTOME	REACTOME_ACYL_CHAIN_REMODELLING_OF_PI	0.0112613	0.0243902
REACTOME	REACTOME_THROMBOXANE_SIGNALLING_THROUGH_TP_RECEPTOR	0.0112613	0.0243902
REACTOME	REACTOME_RESPIRATORY_ELECTRON_TRANSPORT_ATP_SYNTHESIS_BY_CHEMIOSMOTIC_COUPLING_AND_HEAT_PRODUCTION_BY_UNCOUPLING_PROTEINS_	0.0112613	0.0243902
BIOCARTA	BIOCARTA_ERYTH_PATHWAY	0.0112613	0
BIOCARTA	BIOCARTA_P27_PATHWAY	0.0112613	0
REACTOME	REACTOME_ACTIVATED_POINT_MUTANTS_OF_FGFR2	0.0112613	0
REACTOME	REACTOME_G_PROTEIN_ACTIVATION	0.0112613	0
REACTOME	REACTOME_SYNTHESIS_SECRETION_AND_INACTIVATION_OF_GIP	0.0112613	0
REACTOME	REACTOME_PURINE_RIBONUCLEOSIDE_MONOPHOSPHATE_BIOSYNTHESIS	0.00900901	0.243902
KEGG	KEGG_OTHER_GLYCAN_DEGRADATION	0.00900901	0.170732
BIOCARTA	BIOCARTA_CFTR_PATHWAY	0.00900901	0.170732
REACTOME	REACTOME_FACILITATIVE_NA_INDEPENDENT_GLUCOSE_TRANSPORTERS	0.00900901	0.170732
BIOCARTA	BIOCARTA_TCRA_PATHWAY	0.00900901	0.146341
REACTOME	REACTOME_P75NTR_SIGNALS_VIA_NFKB	0.00900901	0.146341
REACTOME	REACTOME_BILE_SALT_AND_ORGANIC_ANION_SLC_TRANSPORTERS	0.00900901	0.146341
KEGG	KEGG_ASTHMA	0.00900901	0.121951
BIOCARTA	BIOCARTA_P35ALZHEIMERS_PATHWAY	0.00900901	0.121951
REACTOME	REACTOME_RESOLUTION_OF_AP_SITES_VIA_THE_MULTIPLE_NUCLEOTIDE_PATCH_REPLACEMENT_PATHWAY	0.00900901	0.121951
KEGG	KEGG_GLYOXYLATE_AND_DICARBOXYLATE_METABOLISM	0.00900901	0.097561
BIOCARTA	BIOCARTA_SRCRPTP_PATHWAY	0.00900901	0.097561
BIOCARTA	BIOCARTA_PTC1_PATHWAY	0.00900901	0.097561
BIOCARTA	BIOCARTA_SARS_PATHWAY	0.00900901	0.097561
REACTOME	REACTOME_NOREPINEPHRINE_NEUROTRANSMITTER_RELEASE_CYCLE	0.00900901	0.097561
REACTOME	REACTOME_PURINE_CATABOLISM	0.00900901	0.097561
PID	PID_P38_GAMMA_DELTA_PATHWAY	0.00900901	0.097561
BIOCARTA	BIOCARTA_FREE_PATHWAY	0.00900901	0.0731707
BIOCARTA	BIOCARTA_SET_PATHWAY	0.00900901	0.0731707
REACTOME	REACTOME_APOPTOSIS_INDUCED_DNA_FRAGMENTATION	0.00900901	0.0731707
REACTOME	REACTOME_ERKS_ARE_INACTIVATED	0.00900901	0.0731707
REACTOME	REACTOME_ACTIVATION_OF_CHAPERONES_BY_ATF6_ALPHA	0.00900901	0.0731707
REACTOME	REACTOME_TRAF6_MEDIATED_IRF7_ACTIVATION_IN_TLR7_8_OR_9_SIGNALING	0.00900901	0.0731707
BIOCARTA	BIOCARTA_NEUROTRANSMITTERS_PATHWAY	0.00900901	0.0487805
REACTOME	REACTOME_RNA_POL_I_TRANSCRIPTION_TERMINATION	0.00900901	0.0487805
REACTOME	REACTOME_ACYL_CHAIN_REMODELLING_OF_PS	0.00900901	0.0487805
REACTOME	REACTOME_E2F_ENABLED_INHIBITION_OF_PRE_REPLICATION_COMPLEX_FORMATION	0.00900901	0.0487805
REACTOME	REACTOME_CHOLESTEROL_BIOSYNTHESIS	0.00900901	0.0487805
KEGG	KEGG_SULFUR_METABOLISM	0.00900901	0.0243902
BIOCARTA	BIOCARTA_SKP2E2F_PATHWAY	0.00900901	0.0243902
BIOCARTA	BIOCARTA_STEM_PATHWAY	0.00900901	0.0243902
REACTOME	REACTOME_SIGNALING_BY_FGFR3_MUTANTS	0.00900901	0.0243902
REACTOME	REACTOME_NRIF_SIGNALS_CELL_DEATH_FROM_THE_NUCLEUS	0.00900901	0.0243902
REACTOME	REACTOME_GLYCOPROTEIN_HORMONES	0.00900901	0.0243902
REACTOME	REACTOME_AMINO_ACID_SYNTHESIS_AND_INTERCONVERSION_TRANSAMINATION	0.00900901	0.0243902
REACTOME	REACTOME_INSULIN_RECEPTOR_RECYCLING	0.00900901	0
REACTOME	REACTOME_BETA_DEFENSINS	0.00900901	0
REACTOME	REACTOME_MITOCHONDRIAL_PROTEIN_IMPORT	0.00900901	0
REACTOME	REACTOME_NFKB_ACTIVATION_THROUGH_FADD_RIP1_PATHWAY_MEDIATED_BY_CASPASE_8_AND10	0.00675676	0.195122
REACTOME	REACTOME_HYALURONAN_UPTAKE_AND_DEGRADATION	0.00675676	0.170732
REACTOME	REACTOME_PHOSPHORYLATION_OF_CD3_AND_TCR_ZETA_CHAINS	0.00675676	0.170732
REACTOME	REACTOME_RESOLUTION_OF_AP_SITES_VIA_THE_SINGLE_NUCLEOTIDE_REPLACEMENT_PATHWAY	0.00675676	0.146341
REACTOME	REACTOME_PASSIVE_TRANSPORT_BY_AQUAPORINS	0.00675676	0.121951
REACTOME	REACTOME_HORMONE_SENSITIVE_LIPASE_HSL_MEDIATED_TRIACYLGLYCEROL_HYDROLYSIS	0.00675676	0.121951
KEGG	KEGG_LIMONENE_AND_PINENE_DEGRADATION	0.00675676	0.097561
BIOCARTA	BIOCARTA_CACAM_PATHWAY	0.00675676	0.097561
BIOCARTA	BIOCARTA_AKAP13_PATHWAY	0.00675676	0.097561
REACTOME	REACTOME_P75NTR_RECRUITS_SIGNALLING_COMPLEXES	0.00675676	0.097561
REACTOME	REACTOME_PYRUVATE_METABOLISM	0.00675676	0.097561
KEGG	KEGG_TAURINE_AND_HYPOTAURINE_METABOLISM	0.00675676	0.0731707
KEGG	KEGG_GLYCOSPHINGOLIPID_BIOSYNTHESIS_GANGLIO_SERIES	0.00675676	0.0731707
REACTOME	REACTOME_BASE_FREE_SUGAR_PHOSPHATE_REMOVAL_VIA_THE_SINGLE_NUCLEOTIDE_REPLACEMENT_PATHWAY	0.00675676	0.0731707
REACTOME	REACTOME_DESTABILIZATION_OF_MRNA_BY_KSRP	0.00675676	0.0731707
PID	KEGG_GLYCOSPHINGOLIPID_BIOSYNTHESIS_GANGLIO_SERIES	0.00675676	0.0731707
REACTOME	REACTOME_CYCLIN_A_B1_ASSOCIATED_EVENTS_DURING_G2_M_TRANSITION	0.00675676	0.0487805
REACTOME	REACTOME_SYNTHESIS_AND_INTERCONVERSION_OF_NUCLEOTIDE_DI_AND_TRIPHOSPHATES	0.00675676	0.0487805
REACTOME	REACTOME_DESTABILIZATION_OF_MRNA_BY_BRF1	0.00675676	0.0487805
REACTOME	REACTOME_DESTABILIZATION_OF_MRNA_BY_TRISTETRAPROLIN_TTP	0.00675676	0.0487805
PID	PID_S1P_S1P4_PATHWAY	0.00675676	0.0487805
REACTOME	REACTOME_OXYGEN_DEPENDENT_PROLINE_HYDROXYLATION_OF_HYPOXIA_INDUCIBLE_FACTOR_ALPHA	0.00675676	0.0243902
REACTOME	REACTOME_TRYPTOPHAN_CATABOLISM	0.00675676	0.0243902
REACTOME	REACTOME_FGFR1_LIGAND_BINDING_AND_ACTIVATION	0.00675676	0.0243902
KEGG	KEGG_PROTEIN_EXPORT	0.00675676	0
REACTOME	REACTOME_BOTULINUM_NEUROTOXICITY	0.00675676	0
REACTOME	REACTOME_P2Y_RECEPTORS	0.00675676	0
REACTOME	REACTOME_ENDOSOMAL_VACUOLAR_PATHWAY	0.0045045	0.317073
REACTOME	REACTOME_ALPHA_LINOLENIC_ACID_ALA_METABOLISM	0.0045045	0.219512
BIOCARTA	BIOCARTA_EPONFKB_PATHWAY	0.0045045	0.170732
REACTOME	REACTOME_NEGATIVE_REGULATION_OF_THE_PI3K_AKT_NETWORK	0.0045045	0.170732
REACTOME	REACTOME_IRAK2_MEDIATED_ACTIVATION_OF_TAK1_COMPLEX_UPON_TLR7_8_OR_9_STIMULATION	0.0045045	0.170732
REACTOME	REACTOME_SYNTHESIS_OF_VERY_LONG_CHAIN_FATTY_ACYL_COAS	0.0045045	0.146341
REACTOME	REACTOME_VITAMIN_B5_PANTOTHENATE_METABOLISM	0.0045045	0.121951
REACTOME	REACTOME_TGF_BETA_RECEPTOR_SIGNALING_IN_EMT_EPITHELIAL_TO_MESENCHYMAL_TRANSITION	0.0045045	0.121951
REACTOME	REACTOME_PD1_SIGNALING	0.0045045	0.121951
KEGG	KEGG_GLYCOSPHINGOLIPID_BIOSYNTHESIS_GLOBO_SERIES	0.0045045	0.097561
BIOCARTA	BIOCARTA_AKAP95_PATHWAY	0.0045045	0.097561
BIOCARTA	BIOCARTA_ETC_PATHWAY	0.0045045	0.097561
BIOCARTA	BIOCARTA_CDK5_PATHWAY	0.0045045	0.097561
REACTOME	REACTOME_ANDROGEN_BIOSYNTHESIS	0.0045045	0.097561
PID	KEGG_GLYCOSPHINGOLIPID_BIOSYNTHESIS_GLOBO_SERIES	0.0045045	0.097561
BIOCARTA	BIOCARTA_TALL1_PATHWAY	0.0045045	0.0731707
REACTOME	REACTOME_NFKB_IS_ACTIVATED_AND_SIGNALS_SURVIVAL	0.0045045	0.0731707
REACTOME	REACTOME_CDC6_ASSOCIATION_WITH_THE_ORC_ORIGIN_COMPLEX	0.0045045	0.0731707
REACTOME	REACTOME_ZINC_TRANSPORTERS	0.0045045	0.0731707
REACTOME	REACTOME_ACTIVATION_OF_THE_AP1_FAMILY_OF_TRANSCRIPTION_FACTORS	0.0045045	0.0731707
REACTOME	REACTOME_VIRAL_MESSENGER_RNA_SYNTHESIS	0.0045045	0.0731707
KEGG	KEGG_TERPENOID_BACKBONE_BIOSYNTHESIS	0.0045045	0.0487805
BIOCARTA	BIOCARTA_DNAFRAGMENT_PATHWAY	0.0045045	0.0487805
REACTOME	REACTOME_ACTIVATION_OF_CHAPERONE_GENES_BY_ATF6_ALPHA	0.0045045	0.0487805
REACTOME	REACTOME_IRAK1_RECRUITS_IKK_COMPLEX	0.0045045	0.0487805
REACTOME	REACTOME_RAF_MAP_KINASE_CASCADE	0.0045045	0.0487805
REACTOME	REACTOME_INTEGRATION_OF_PROVIRUS	0.0045045	0.0487805
PID	PID_P38_MK2_PATHWAY	0.0045045	0.0487805
PID	PID_ALK2_PATHWAY	0.0045045	0.0243902
BIOCARTA	BIOCARTA_HSP27_PATHWAY	0.0045045	0
REACTOME	REACTOME_PROTEOLYTIC_CLEAVAGE_OF_SNARE_COMPLEX_PROTEINS	0.0045045	0
REACTOME	REACTOME_FGFR2C_LIGAND_BINDING_AND_ACTIVATION	0.0045045	0
BIOCARTA	BIOCARTA_KREB_PATHWAY	0.00225225	0.219512
REACTOME	REACTOME_REGULATION_OF_PYRUVATE_DEHYDROGENASE_PDH_COMPLEX	0.00225225	0.170732
REACTOME	REACTOME_TRANSLOCATION_OF_ZAP_70_TO_IMMUNOLOGICAL_SYNAPSE	0.00225225	0.170732
BIOCARTA	BIOCARTA_EIF2_PATHWAY	0.00225225	0.146341
REACTOME	REACTOME_COPI_MEDIATED_TRANSPORT	0.00225225	0.146341
REACTOME	REACTOME_REVERSIBLE_HYDRATION_OF_CARBON_DIOXIDE	0.00225225	0.121951
BIOCARTA	BIOCARTA_SALMONELLA_PATHWAY	0.00225225	0.097561
BIOCARTA	BIOCARTA_RANKL_PATHWAY	0.00225225	0.0731707
BIOCARTA	BIOCARTA_SODD_PATHWAY	0.00225225	0.0731707
REACTOME	REACTOME_REGULATION_OF_IFNG_SIGNALING	0.00225225	0.0731707
BIOCARTA	BIOCARTA_PARKIN_PATHWAY	0.00225225	0.0487805
REACTOME	REACTOME_PROSTANOID_LIGAND_RECEPTORS	0.00225225	0.0487805
REACTOME	REACTOME_MRNA_DECAY_BY_5_TO_3_EXORIBONUCLEASE	0.00225225	0.0487805
REACTOME	REACTOME_MRNA_DECAY_BY_3_TO_5_EXORIBONUCLEASE	0.00225225	0.0487805
REACTOME	REACTOME_BINDING_AND_ENTRY_OF_HIV_VIRION	0.00225225	0.0487805
BIOCARTA	BIOCARTA_IL5_PATHWAY	0.00225225	0.0243902
REACTOME	REACTOME_MEMBRANE_BINDING_AND_TARGETTING_OF_GAG_PROTEINS	0.00225225	0.0243902
REACTOME	REACTOME_SYNTHESIS_OF_PE	0.00225225	0.0243902
REACTOME	REACTOME_SYNTHESIS_OF_SUBSTRATES_IN_N_GLYCAN_BIOSYTHESIS	0.00225225	0.0243902
BIOCARTA	BIOCARTA_TCAPOPTOSIS_PATHWAY	0.00225225	0
BIOCARTA	BIOCARTA_RAB_PATHWAY	0.00225225	0
REACTOME	REACTOME_ASSOCIATION_OF_LICENSING_FACTORS_WITH_THE_PRE_REPLICATIVE_COMPLEX	0.00225225	0
REACTOME	REACTOME_ADVANCED_GLYCOSYLATION_ENDPRODUCT_RECEPTOR_SIGNALING	0.00225225	0
REACTOME	REACTOME_FGFR4_LIGAND_BINDING_AND_ACTIVATION	0.00225225	0
REACTOME	REACTOME_EXTRINSIC_PATHWAY_FOR_APOPTOSIS	0	0.097561
REACTOME	REACTOME_PURINE_SALVAGE	0	0.0487805
REACTOME	REACTOME_REMOVAL_OF_THE_FLAP_INTERMEDIATE_FROM_THE_C_STRAND	0	0.0487805
REACTOME	REACTOME_SIGNALING_BY_ACTIVATED_POINT_MUTANTS_OF_FGFR1	0	0.0243902
REACTOME	REACTOME_METABOLISM_OF_POLYAMINES	0	0.0243902
REACTOME	REACTOME_APOBEC3G_MEDIATED_RESISTANCE_TO_HIV1_INFECTION	0	0.0243902
BIOCARTA	BIOCARTA_AHSP_PATHWAY	0	0
REACTOME	REACTOME_SLBP_DEPENDENT_PROCESSING_OF_REPLICATION_DEPENDENT_HISTONE_PRE_MRNAS	0	0
REACTOME	REACTOME_FORMATION_OF_ATP_BY_CHEMIOSMOTIC_COUPLING	0	0
